# Supplementary material for: An integrated and homogenized global surface solar radiation dataset and its reconstruction based on a convolutional neural network approach
Source: Copernicus journal article supplement (doi:10.5194/essd-15-4519-2023), 2023-10-06
Supplement: Supplementary file 1 [file essd-15-4519-2023-supplement.pdf]

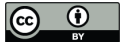

*Supplement of*

## **An integrated and homogenized global surface solar radiation dataset and its reconstruction based on a convolutional neural network approach**

**Boyang Jiao et al.**

*Correspondence to:* Qingxiang Li (liqingx5@mail.sysu.edu.cn)

The copyright of individual parts of the supplement might differ from the article licence.

24 **Text S1 Convolutional Neural Network (CNN) deep learning model (convolutional layer, loss**  
 25 **function)**

26 Convolutional layer using partial convolution and mask update: The partial convolution operation and  
 27 the mask update function are called the partial convolution layer (Liu et al., 2018). The partial  
 28 convolution operation and the mask update function are called the partial convolution layer. The partial  
 29 convolution at each position can be expressed as

$$x' = \begin{cases} W^T \left( X \odot M \right) \frac{\text{sum}(1)}{\text{sum}(M)} + b, & \text{if } \text{sum}(M) > 0 \\ 0, & \text{otherwise} \end{cases} \quad (\text{S1})$$

30  $\odot$  denotes element-by-element multiplication, where 1 and  $M$  in the above equation have the same shape,  
 31 and all elements in 1 are 1. Eq. (1) illustrates that our output value depends only on the valid input and  
 32 that  $\frac{\text{sum}(1)}{\text{sum}(M)}$  is used to adjust the amount of change in the valid value of the input.

$$m' = \begin{cases} 1, & \text{if } \text{sum}(M) > 0 \\ 0, & \text{otherwise} \end{cases} \quad (\text{S2})$$

33 After each partial convolution operation, use equation (2) to update the mask Eq. (2) indicates that we  
 34 mark that position as valid whenever the convolution can adjust its output according to at least one valid  
 35 value. In other words, marking 1 where there is a value and 0 for the default part is the so-called binary  
 36 mask. This approach can be implemented in any deep learning structure as part of a forward delivery.  
 37 With enough partial convolutions, the input values will all eventually become valid, i.e., any masks will  
 38 all become 1. Partial convolution layers can be implemented by extending the existing standard Pytorch  
 39 library. The most straightforward implementation is to define a binary mask of the shape  $C \times H \times W$   
 40 that is the same size as its associated image and feature values. And then, update the mask using a fixed  
 41 convolutional layer of the same size and operation as the partial convolutional layer, with the same weight  
 42 (weight of 1) and no bias.

43 The model loss function is set for each pixel reconstruction accuracy and the transition smoothness of  
 44 the repaired missing measurements to their surroundings. Let the input image be  $I_i$ , the initial binary  
 45 mask be  $M$ , the predicted value be  $I_{out}$ , and the actual value be  $I_{gt}$ . Eq. (3) and Eq. (4) calculate the loss  
 46 value for each pixel, where Eq. (3) calculates the default value portion of the loss value and Eq. (4)  
 47 calculates the actual value portion of the loss value.

$$\mathcal{L}_{hole} = \|(1 - M) \odot (I_{out} - I_{gt})\|_1 \quad (\text{S3})$$

$$\mathcal{L}_{valid} = \|M \odot (I_{out} - I_{gt})\|_1 \quad (S4)$$

48 Define the Perceptual Loss function (Eq. (5)) and the Style Loss function (Eq. (6) and (7)). Where  
 49  $I_{comp}$  denotes the original data, where the valid value is the true value and  $K_n$  denotes the normalization  
 50 factor.

$$\mathcal{L}_{perceptual} = \sum_{n=0}^{N-1} \|\Psi_n(I_{out}) - \Psi_n(I_{gt})\|_1 + \sum_{n=0}^{N-1} \|\Psi_n(I_{comp}) - \Psi_n(I_{gt})\|_1 \quad (S5)$$

$$\mathcal{L}_{style_{out}} = \sum_{n=0}^{N-1} \|K_n((\Psi_n(I_{out}))^T(\Psi_n(I_{out})) - (\Psi_n(I_{gt}))^T(\Psi_n(I_{gt})))\|_1 \quad (S6)$$

$$\mathcal{L}_{style_{comp}} = \sum_{n=0}^{N-1} \|K_n((\Psi_n(I_{comp}))^T(\Psi_n(I_{comp})) - (\Psi_n(I_{gt}))^T(\Psi_n(I_{gt})))\|_1 \quad (S7)$$

51 Finally, the Total Variation Loss function is defined in equation (8). This loss function effectively  
 52 smoothes the image, reducing the total variation of the signal and removing unwanted details while  
 53 retaining essential details such as edges.

$$\mathcal{L}_{tv} = \sum_{(i,j) \in P, (i,j+1) \in P} \|I_{comp}^{i,j+1} - I_{comp}^{i,j}\|_1 + \sum_{(i,j) \in P, (i+1,j) \in P} \|I_{comp}^{i+1,j} - I_{comp}^{i,j}\|_1 \quad (S8)$$

54 First, we set the batch size to 16 in the first 500000 iterations and fine-tuned it to 18 in the last  
 55 1000000 iterations, for a total of 1500000 iterations, to suppress the overfitting phenomenon generated  
 56 during the training process, and validate the model every 10000 times and early stopping if the validation  
 57 shows a decreasing trend, the final number of training times used is 1100000. Second, L2 regularization  
 58 is also added to regulate the loss function. The initial hyper-parameters of the model are set as follows;  
 59 learning rate of  $2e-4$  and learning finetune of  $5e-5$ .

60 The final loss function equation (9) is constructed by combining all the loss functions necessary for  
 61 image restoration, and a validation set of 100 images confirms this equation's hyperparameters.

$$\begin{aligned} \mathcal{L}_{total} = & \mathcal{L}_{valid} + 6\mathcal{L}_{hole} + 0.05\mathcal{L}_{perceptual} + 120(\mathcal{L}_{style_{out}} + \mathcal{L}_{style_{comp}}) \\ & + 0.1\mathcal{L}_{tv} + \alpha\|\omega\|_2^2 \end{aligned} \quad (S9)$$

62

**Table S1: CMIP6 numerical models for training the neural network. CMIP6 Historical monthly experiments between 1955 and 2014 are applied to train the CMIP6-AI.**

|   | <b>Source ID</b> | <b>N°</b> | <b>Ensemble</b>                                                                              |
|---|------------------|-----------|----------------------------------------------------------------------------------------------|
| 1 | ACCESS-ESM1-5    | 40        | r1i1p1f1-r40i1p1f1                                                                           |
| 2 | CNRM-CM6-1       | 30        | r1i1p1f2-r30i1p1f2                                                                           |
| 3 | CNRM-ESM2-1      | 11        | r1i1p1f2-r11i1p1f2                                                                           |
| 4 | EC-Earth3        | 22        | r1i1p1f1-r4i1p1f1; r6i1p1f1; r7i1p1f1; r9i1p1f1;<br>r10i1p1f1-r19i1p1f1; r21i1p1f1-r25i1p1f1 |
| 5 | EC-Earth3-CC     | 10        | r1i1p1f1; r4i1p1f1; r6i1p1f1-r13i1p1f1                                                       |
| 6 | MRI-ESM2-0       | 12        | r1i1p1f1-r10i1p1f1; r1i2p1f1; r1i1000p1f1                                                    |

63



64 **Table S3 Trends and their 95% confidence ranges in various data sources global SSR change (units:**  
 65 **W/m<sup>2</sup> per decade). \* Indicate trends that are significant at the 5% level.**

| Type                  | 1955-1991       | 1991-2018      | 1955-2018       |
|-----------------------|-----------------|----------------|-----------------|
| SSRI <sub>grid</sub>  | -1.995 ± 0.251* | 0.999 ± 0.504* | -0.494 ± 0.228* |
| SSRIH <sub>grid</sub> | -1.776 ± 0.230* | 0.851 ± 0.410* | -0.554 ± 0.197* |
| SSRIH <sub>20CR</sub> | -1.276 ± 0.205* | 0.697 ± 0.359* | -0.434 ± 0.148* |
| ERA5                  | -1.162 ± 0.319* | 0.653 ± 0.350* | -0.180 ± 0.176* |

66

67 **Table S4 Trends and their 95% confidence ranges in continental and hemispheric SSRIH<sub>20CR</sub>**  
 68 **change (Units: W/m<sup>2</sup> per decade). \* Indicate trends that are significant at the 5% level.**

| Continental      | Time period /Trend | Time period /Trend |
|------------------|--------------------|--------------------|
| North America    | 1955-1973          | 1973-2018          |
|                  | -3.588 ± 1.290*    | 1.074 ± 0.278*     |
| South America    | 1955-1990          | 1990-2018          |
|                  | -0.408 ± 0.619     | 0.049 ± 0.768      |
| Europe           | 1963-1978          | 1978-2018          |
|                  | -2.180 ± 1.866*    | 1.081 ± 0.312*     |
| Africa           | 1955-1991          | 1991-2018          |
|                  | -1.506 ± 0.496*    | 0.340 ± 0.998      |
| Asia             | 1955-1990          | 1990-2018          |
|                  | -1.633 ± 0.473*    | 0.435 ± 0.505      |
| North Hemisphere | 1955-1991          | 1991-2018          |
|                  | -1.457 ± 0.246*    | 0.887 ± 0.415*     |
| South Hemisphere | 1955-1991          | 1991-2018          |
|                  | -0.708 ± 0.330*    | -0.076 ± 0.656*    |

69

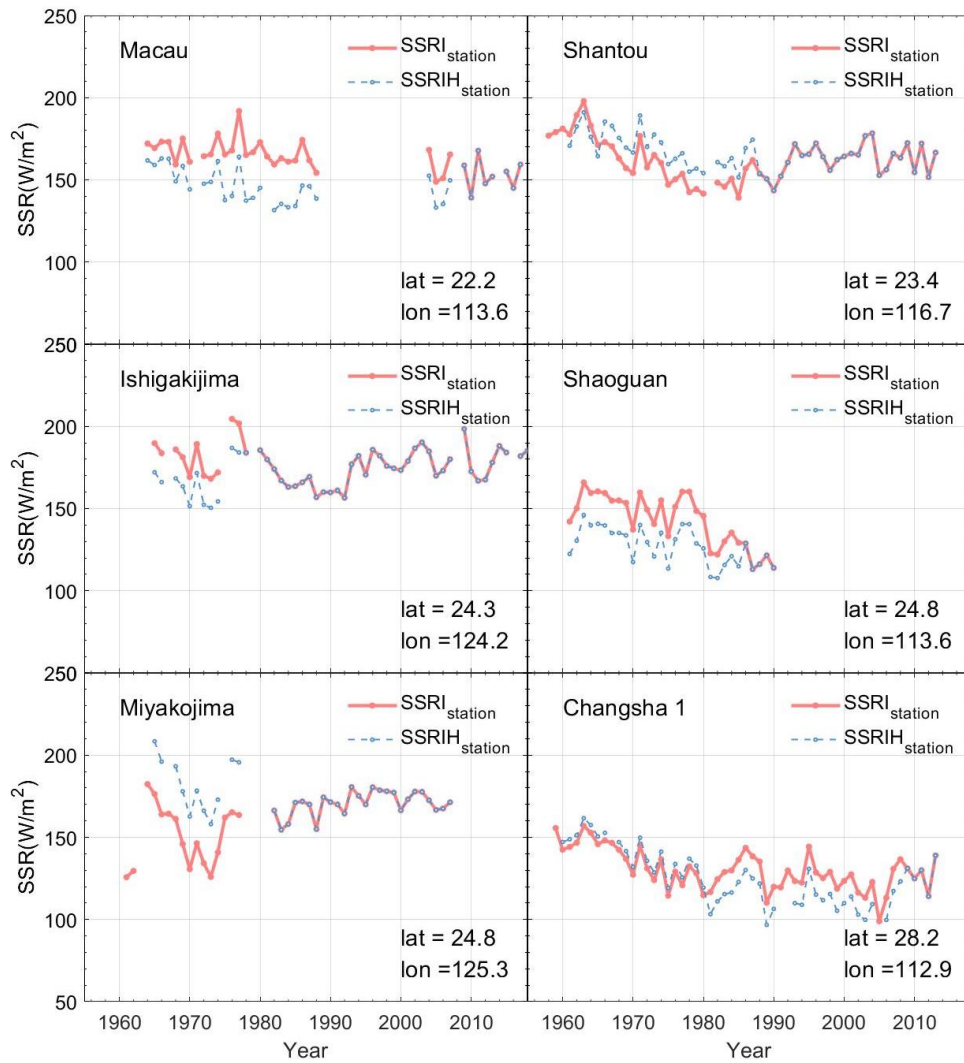

70

71

Figure S1-1 Annual variation of SSR calculated from the original station SSR series (SSRI<sub>station</sub>, blue line),

72

the station SSR series after homogenization (SSRIH<sub>station</sub>, red line).

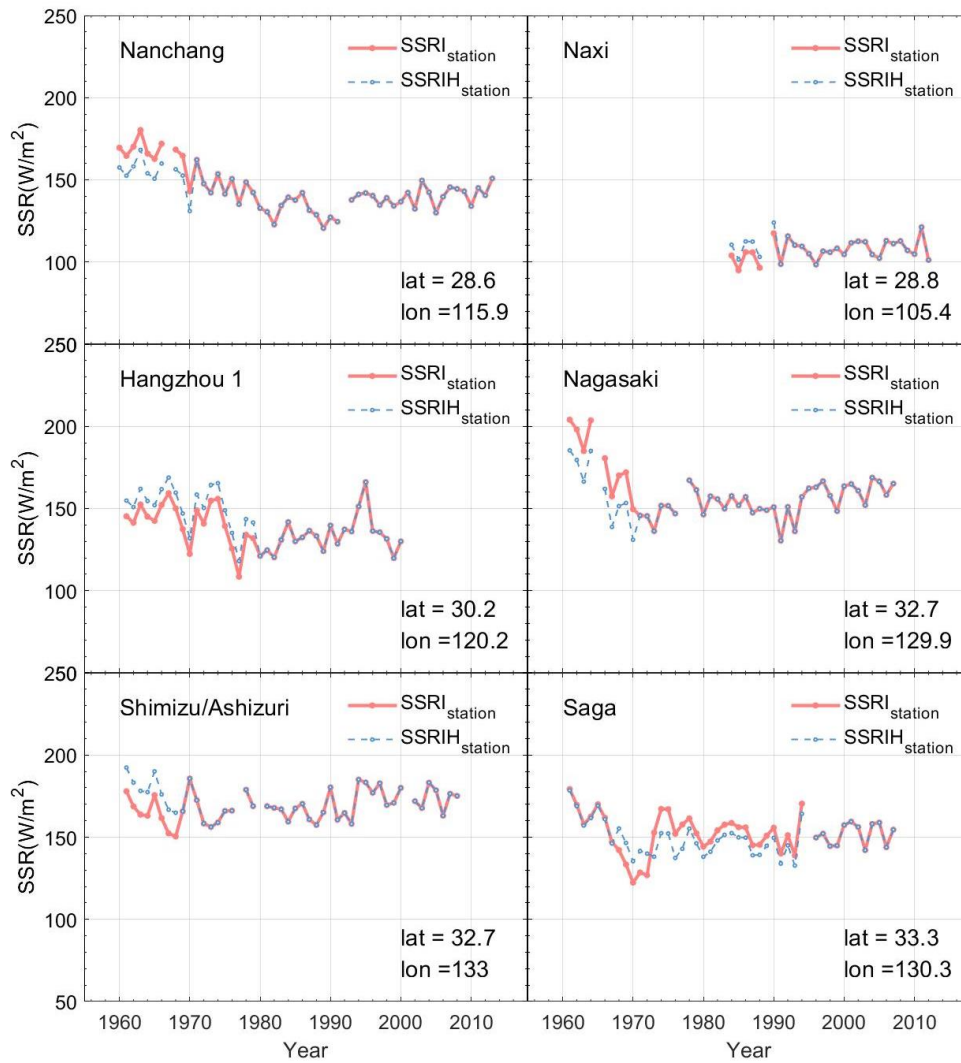

73

74

Figure S1-2 Annual variation of SSR calculated from the original station SSR series (SSRI<sub>station</sub>, blue line),

75

the station SSR series after homogenization (SSRIH<sub>station</sub>, red line).

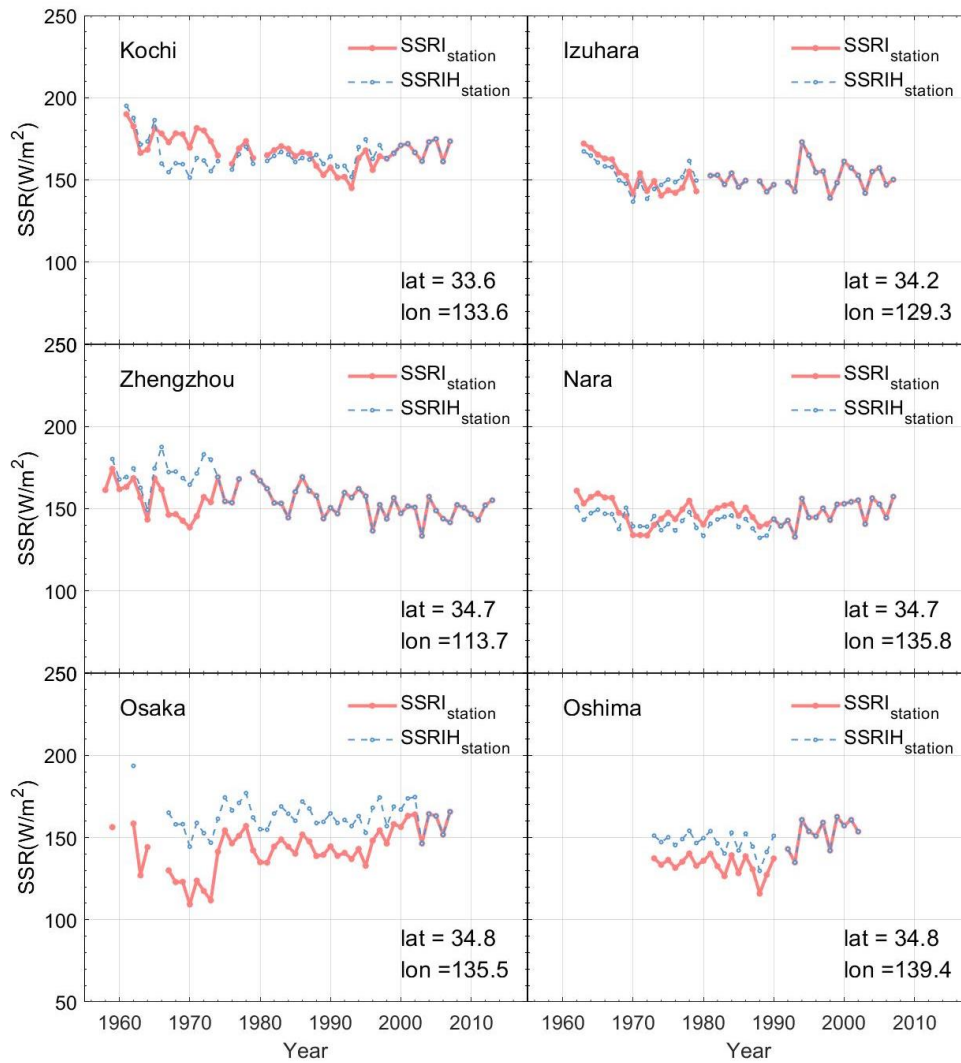

76

77 **Figure S1-3 Annual variation of SSR calculated from the original station SSR series (SSRI<sub>station</sub>, blue line),**

78 **the station SSR series after homogenization (SSRIH<sub>station</sub>, red line).**

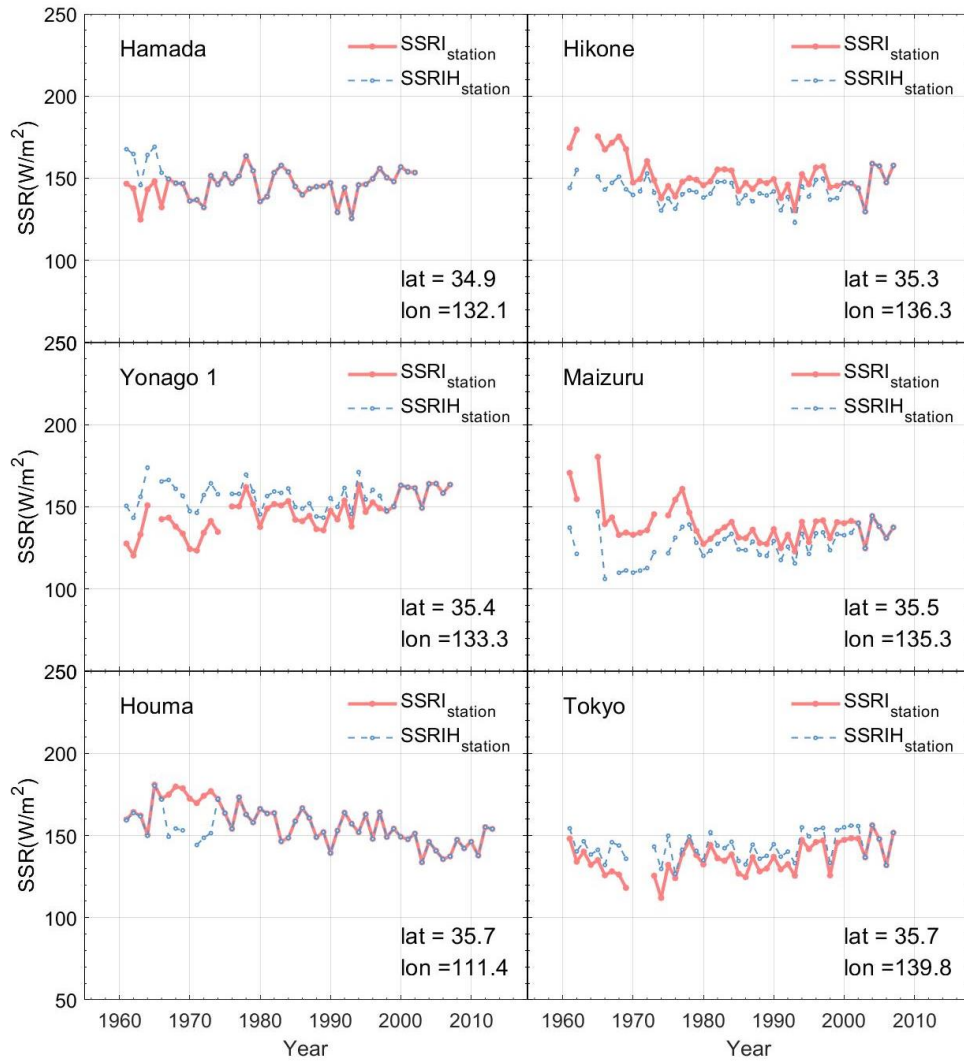

79

80

**Figure S1-4 Annual variation of SSR calculated from the original station SSR series (SSRI<sub>station</sub>, blue line),**

81

**the station SSR series after homogenization (SSRIH<sub>station</sub>, red line).**

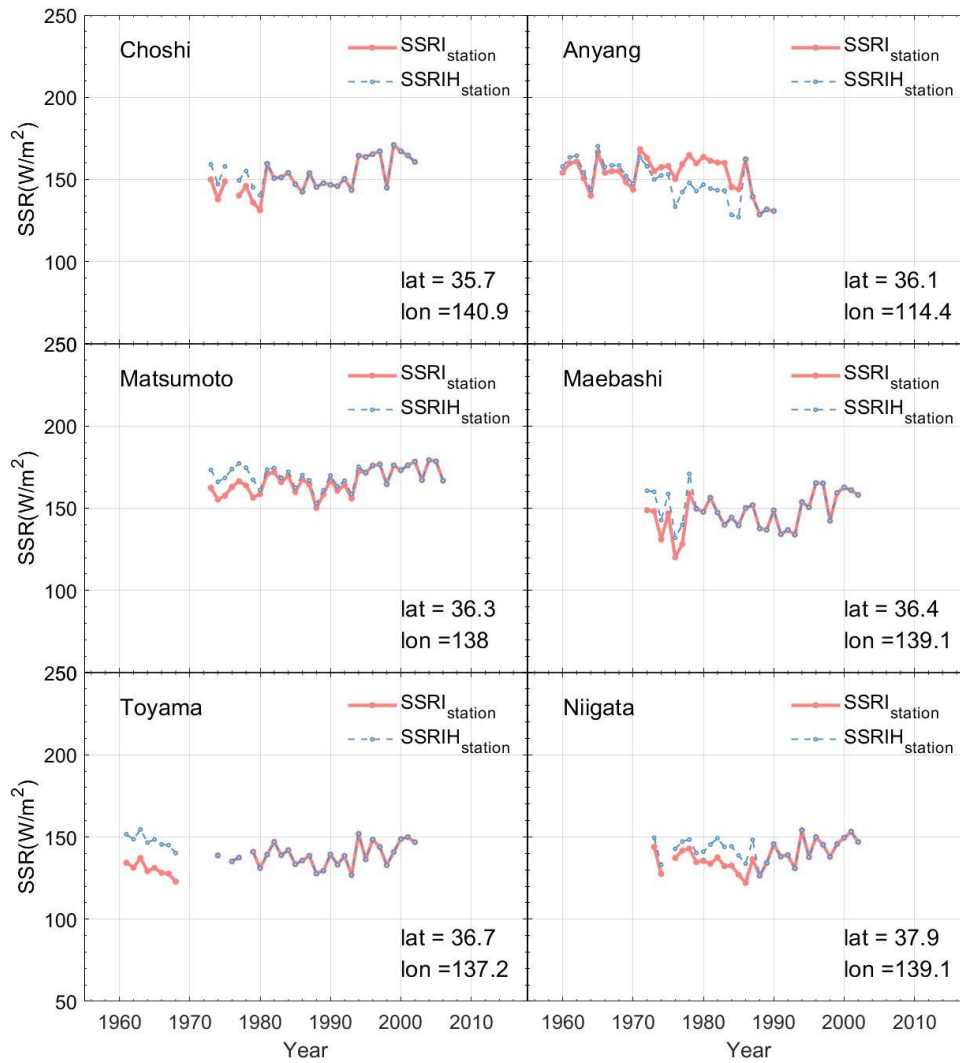

82

83

**Figure S1-5 Annual variation of SSR calculated from the original station SSR series (SSRI<sub>station</sub>, blue line),**

84

**the station SSR series after homogenization (SSRIH<sub>station</sub>, red line).**

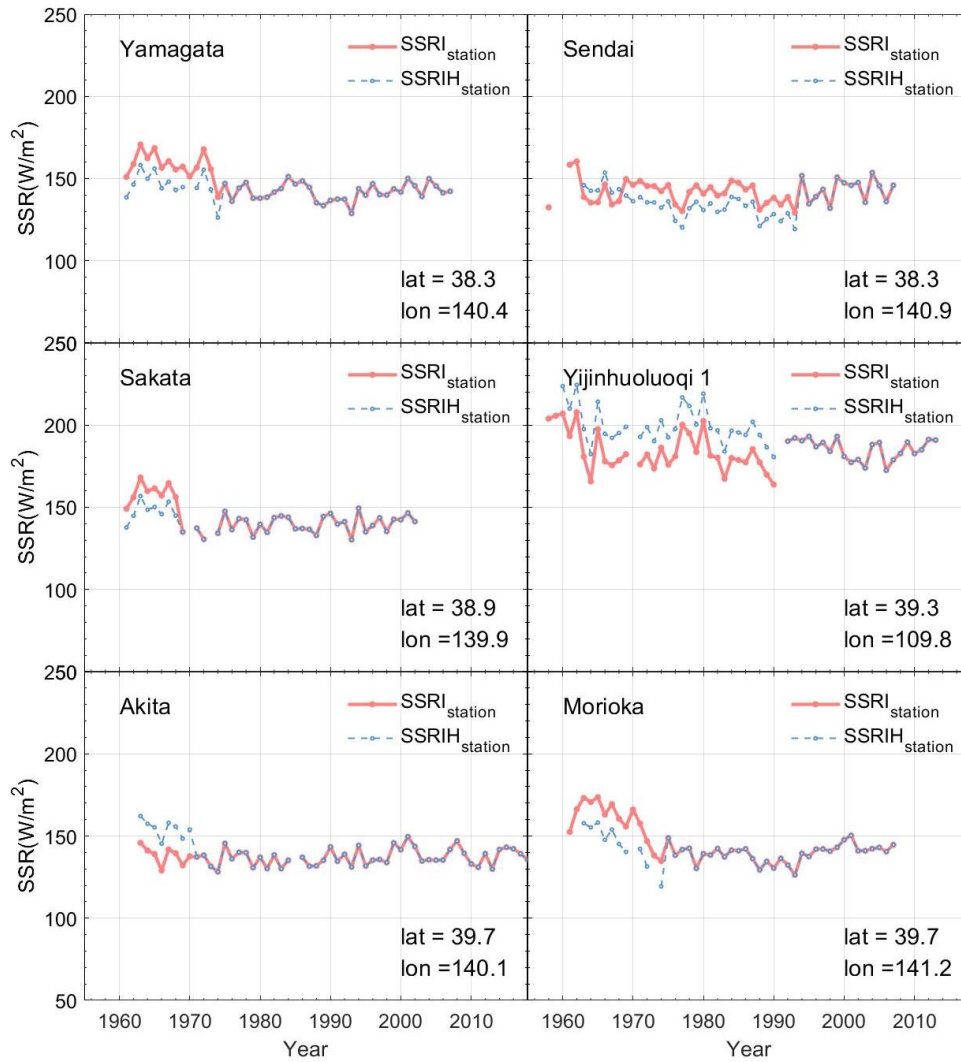

85

86

87

**Figure S1-6 Annual variation of SSR calculated from the original station SSR series (SSRI<sub>station</sub>, blue line), the station SSR series after homogenization (SSRIH<sub>station</sub>, red line).**



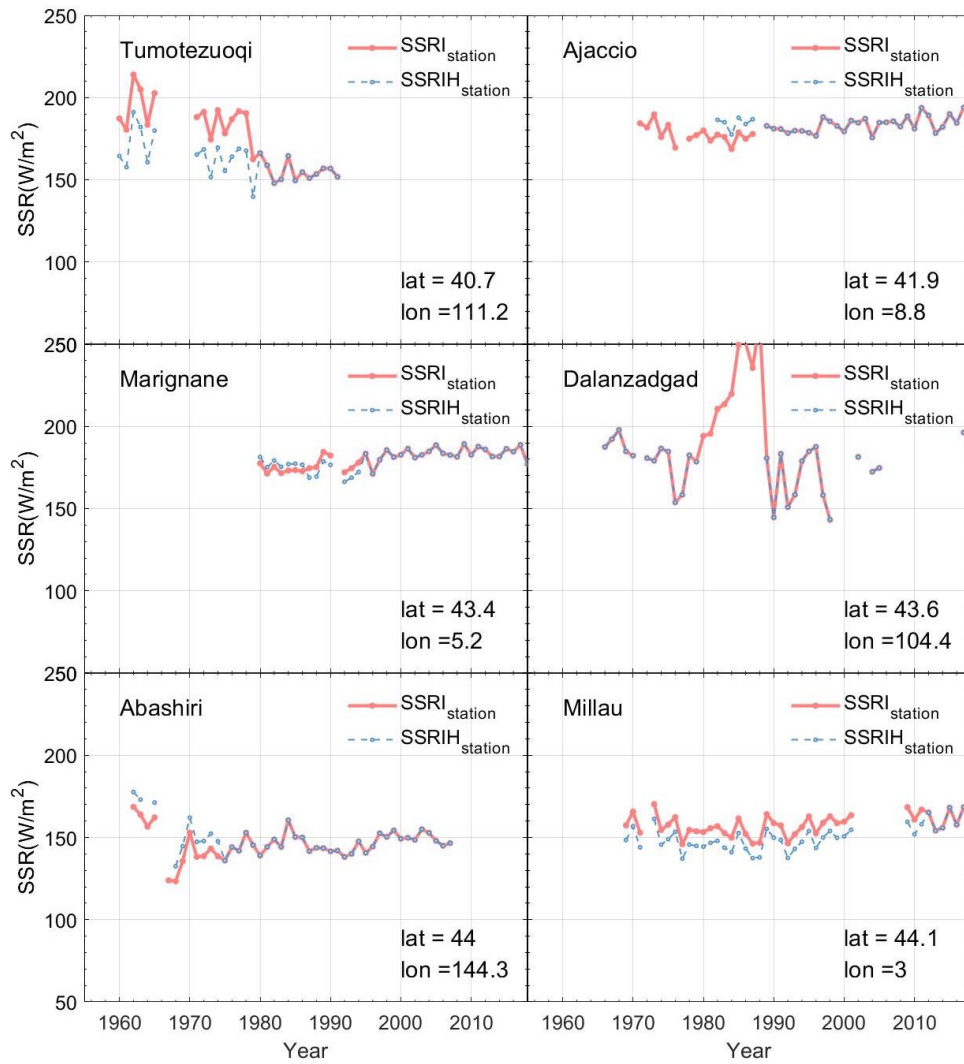

88

89

Figure S1-7 Annual variation of SSR calculated from the original station SSR series (SSRI<sub>station</sub>, blue line), the station SSR series after homogenization (SSRIH<sub>station</sub>, red line).

90

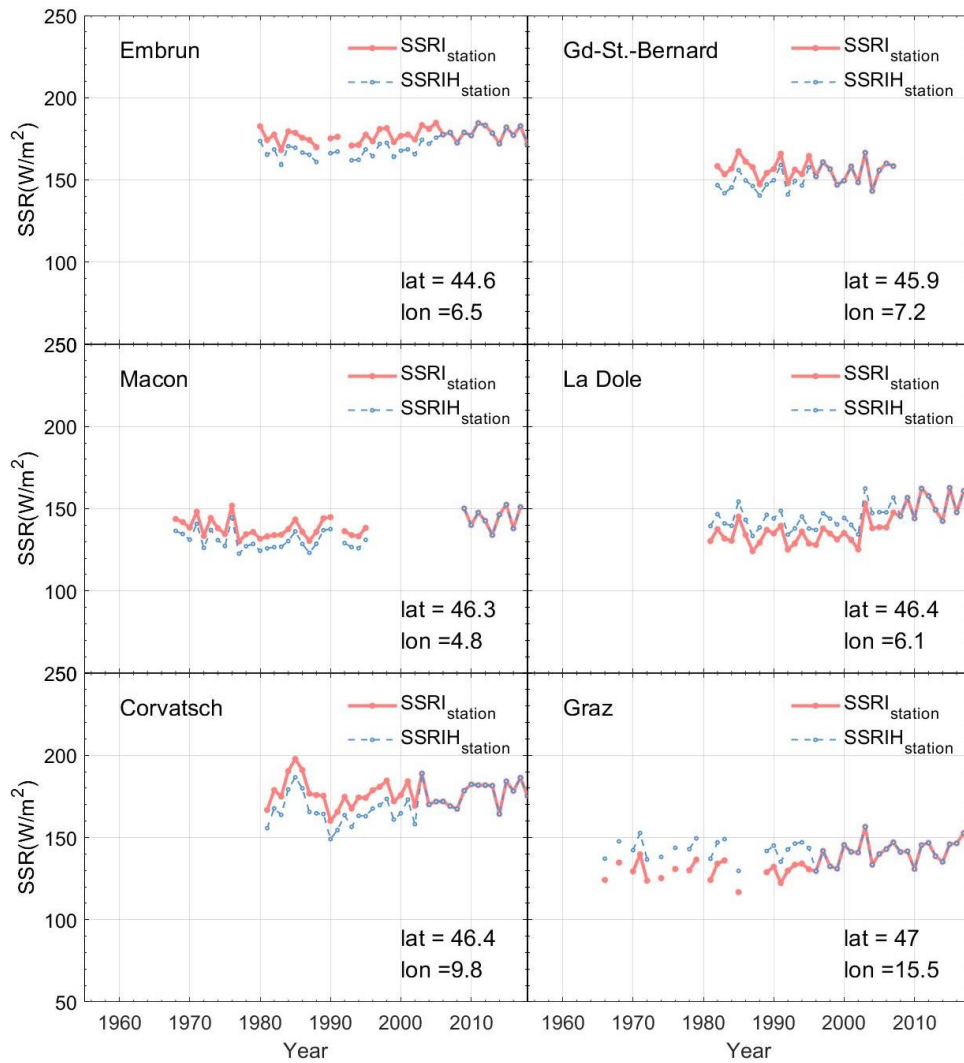

91  
92  
93

Figure S1-8 Annual variation of SSR calculated from the original station SSR series (SSRI<sub>station</sub>, blue line), the station SSR series after homogenization (SSRIH<sub>station</sub>, red line).

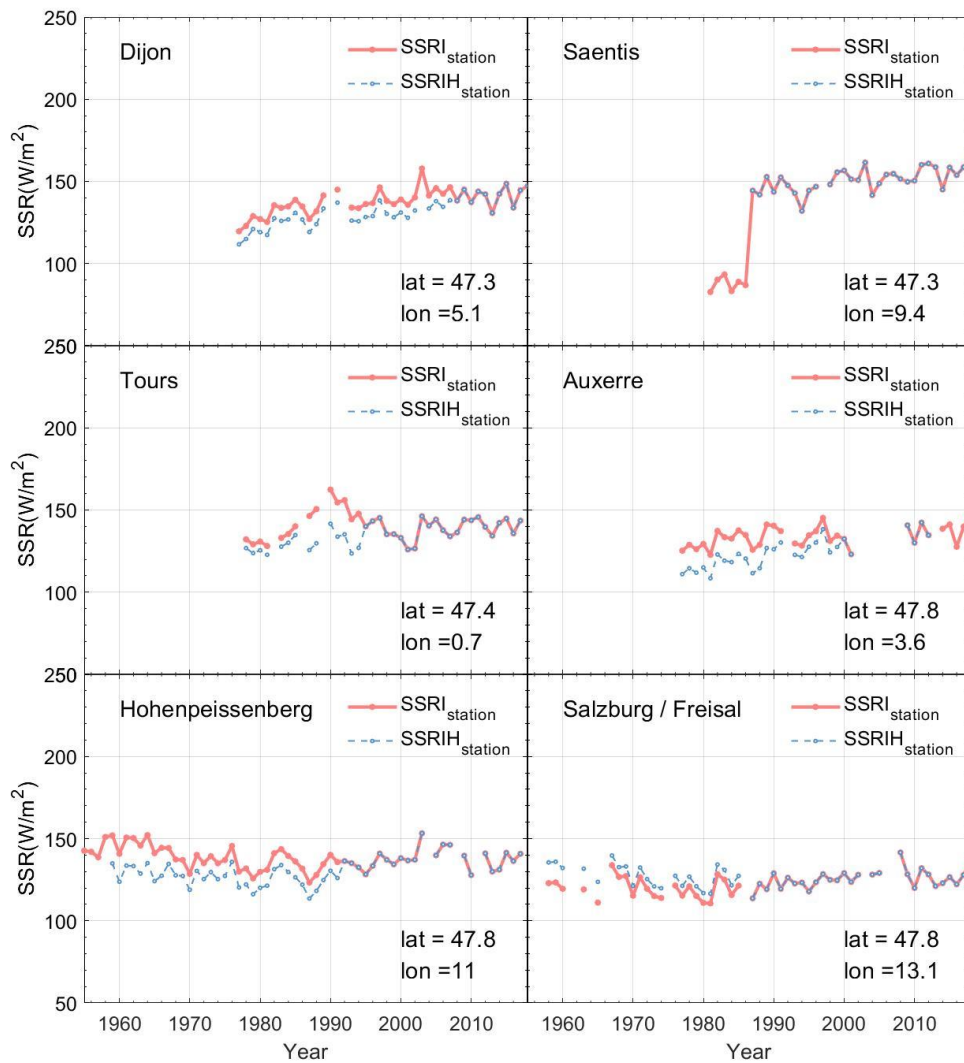

94

95

**Figure S1-9 Annual variation of SSR calculated from the original station SSR series (SSRI<sub>station</sub>, blue line),**

96

**the station SSR series after homogenization (SSRIH<sub>station</sub>, red line).**

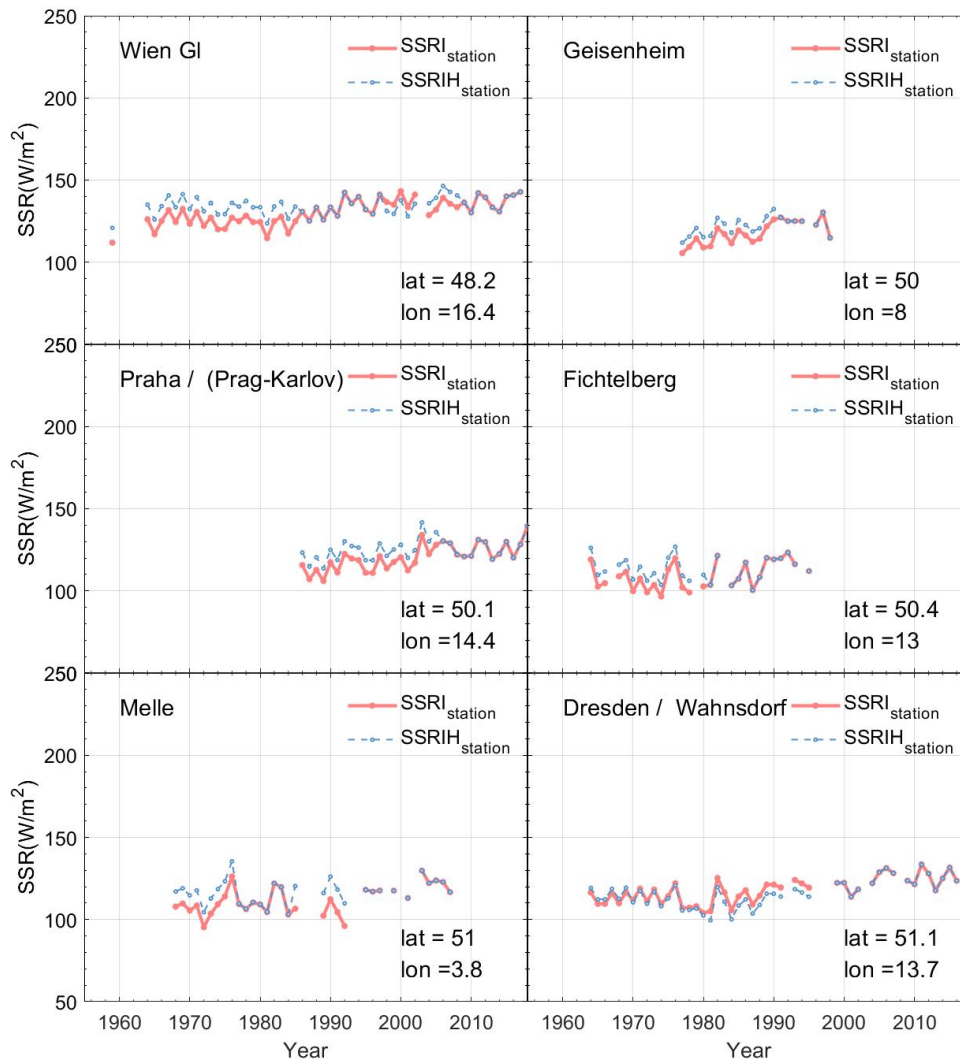

97

98

Figure S1-10 Annual variation of SSR calculated from the original station SSR series (SSRI<sub>station</sub>, blue line),

99

the station SSR series after homogenization (SSRIH<sub>station</sub>, red line).

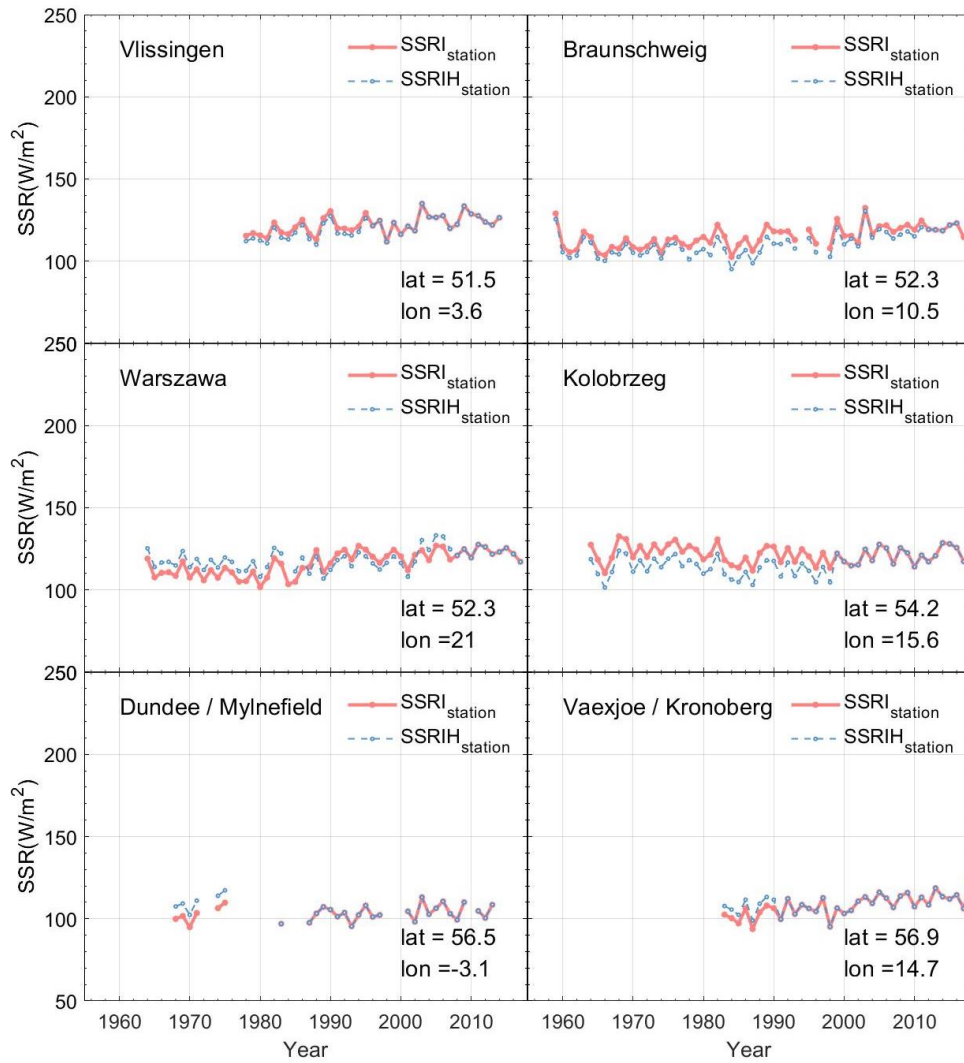

100

101

102

Figure S1-11 Annual variation of SSR calculated from the original station SSR series (SSRI<sub>station</sub>, blue line), the station SSR series after homogenization (SSRIH<sub>station</sub>, red line).

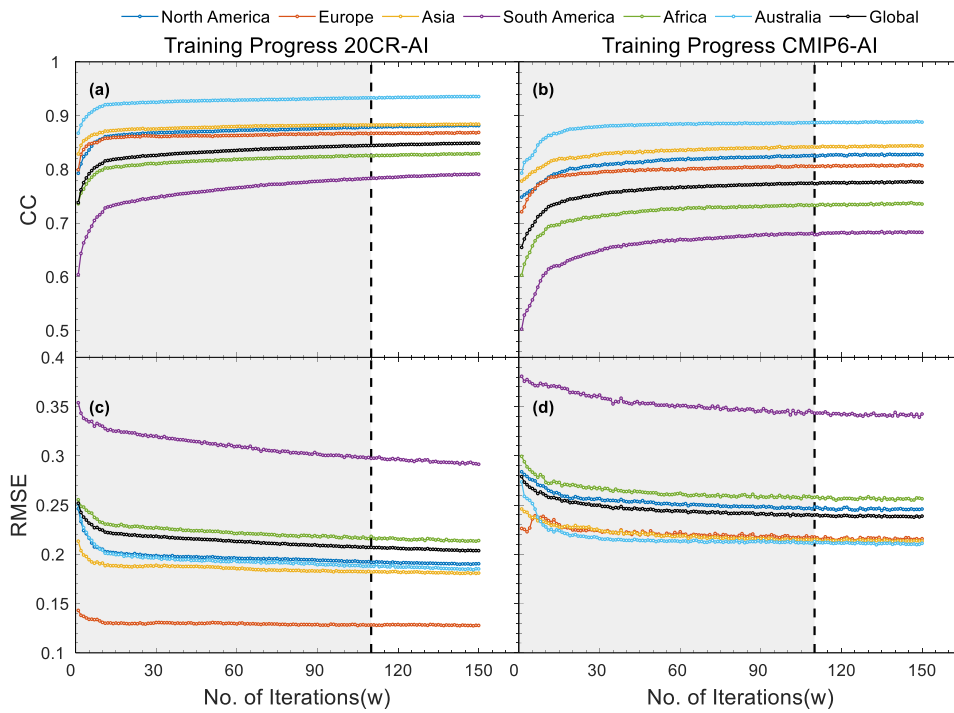

103  
 104 **Figure S2: 20CR-AI (CMIP6-AI) reconstruction model evaluation. Figure S3 (a /b) and (c /d) show the**  
 105 **correlation coefficient (CC) and root mean squared error (RMSE) of the 20crAI /CMIP6AI model**  
 106 **reconstruction results with the validation set for the different number of iterations.**

107

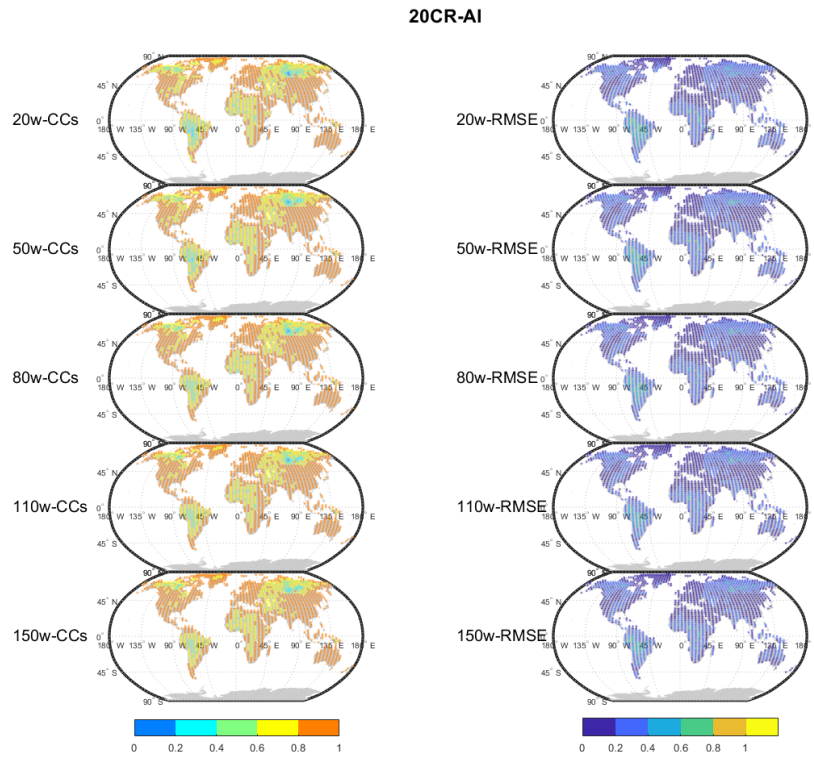

108  
 109  
 110  
 111  
 112

**Figure S3: 20CR-AI reconstruction model evaluation.** The left and right panels show the spatial distribution of the CC and the RMSE of the 20CR-AI model reconstruction results with the 20CR validation set for the different number of iterations, respectively.

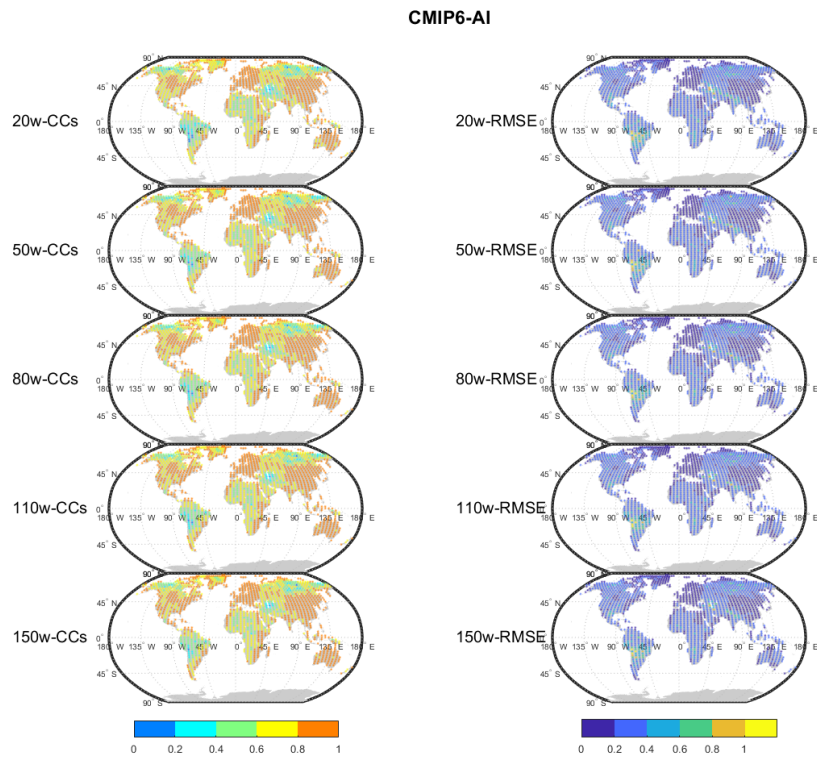

113

114 **Figure S4: same as Figure S3, but for CMIP6-AI.**

115



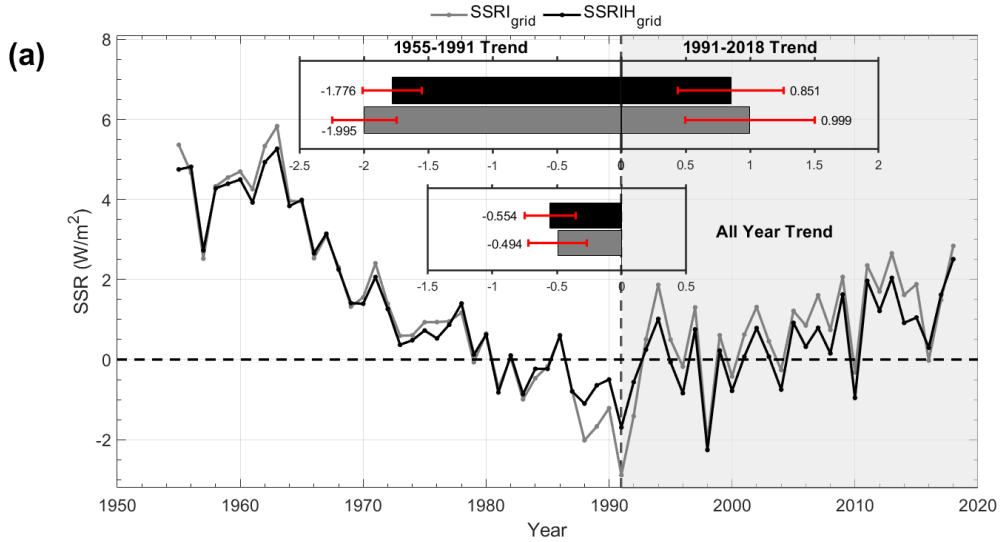

116

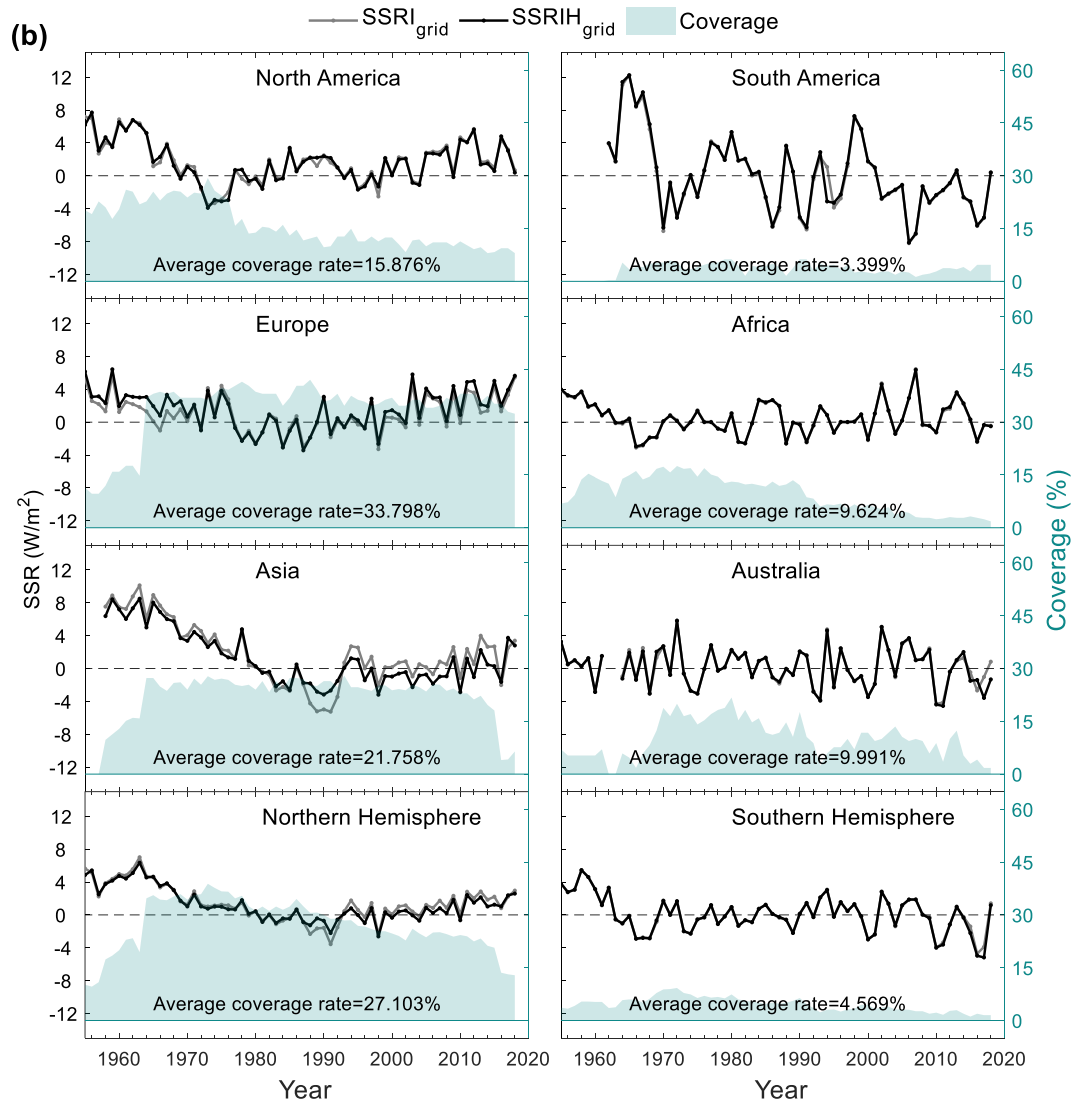

117

118 **Figure S5: Time series of the annual global (a) /regional (b) SSR anomaly variations (relative to 1971-2000)**

119 **before /after homogenization. The Grey /black solid line represents SSR before homogenization (SSRI<sub>grid</sub>)**

120 **/SSRIH<sub>grid</sub> annual anomalies. The histograms represent the decadal trends of the SSRI<sub>grid</sub> /SSRIH<sub>grid</sub> (unit:**

121 **W/m<sup>2</sup> per decade) and their 95% uncertainty range during three periods 1955-1988, 1988-2018 and 1955-**



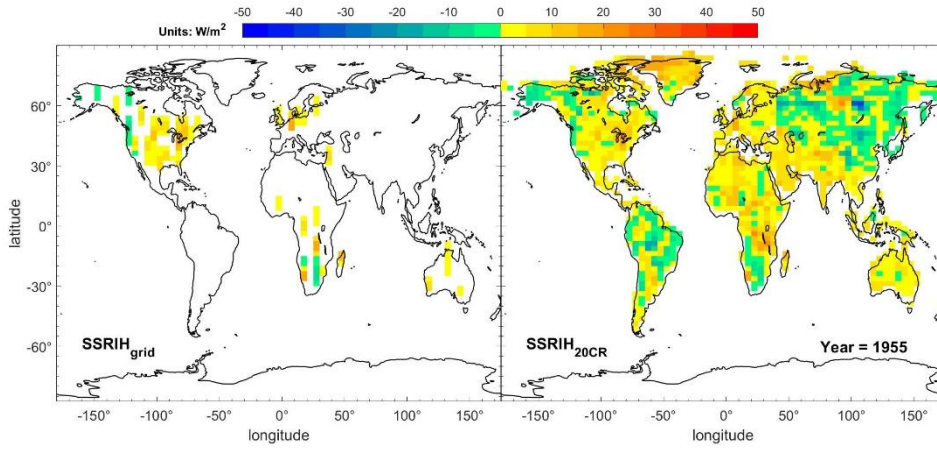

123

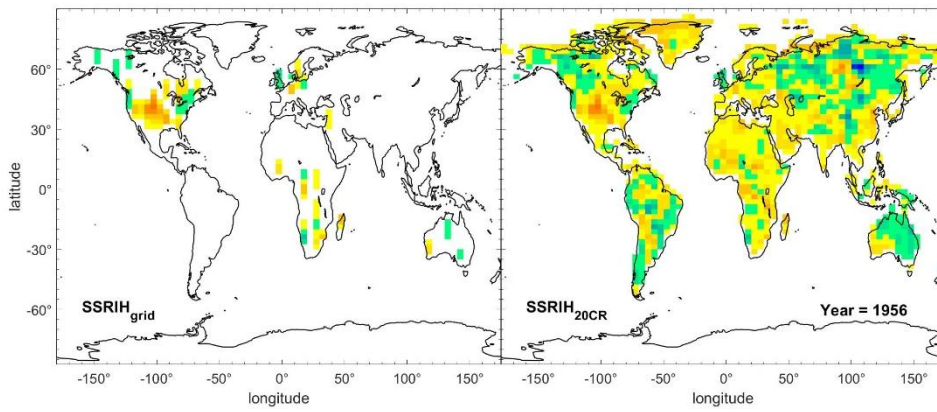

124

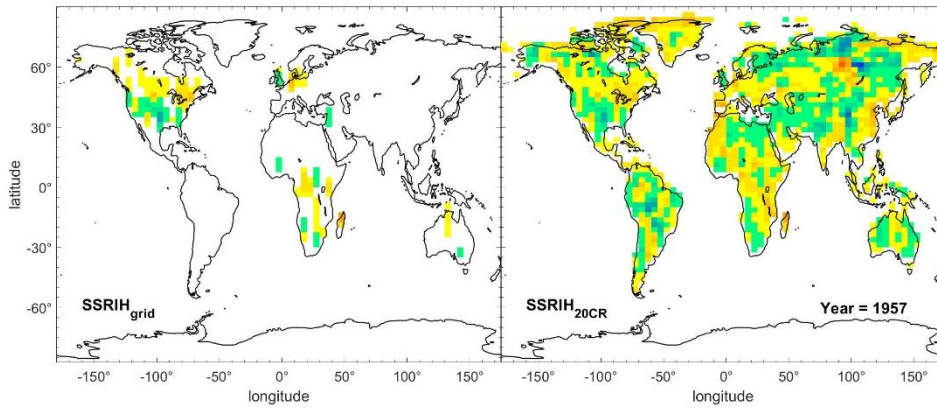

125

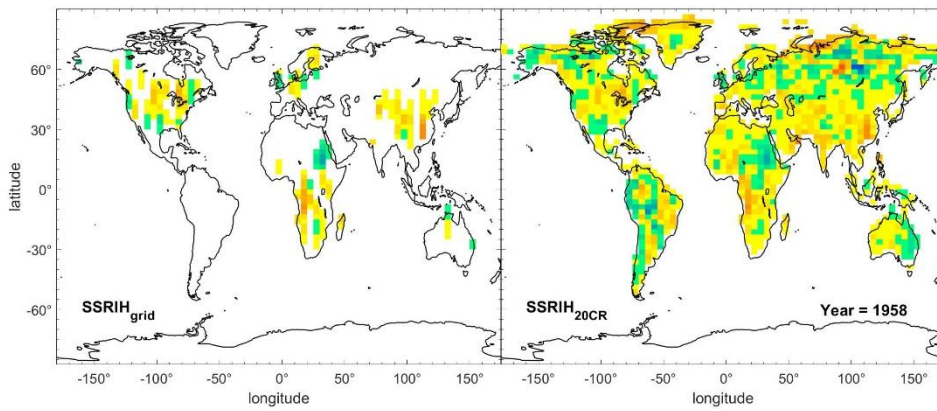

126

127

Figure S6-1: Spatial distribution of SSRIH<sub>grid</sub> (column 1) and the SSR of reconstruction based on the 20CR-AI model (SSRIH<sub>20CR</sub> (column 2)) in typical years (1955-1958).

128

129

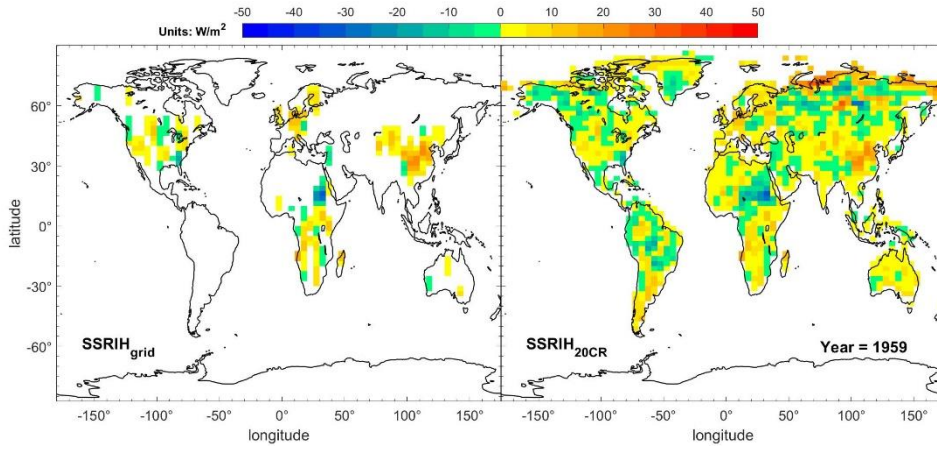

130

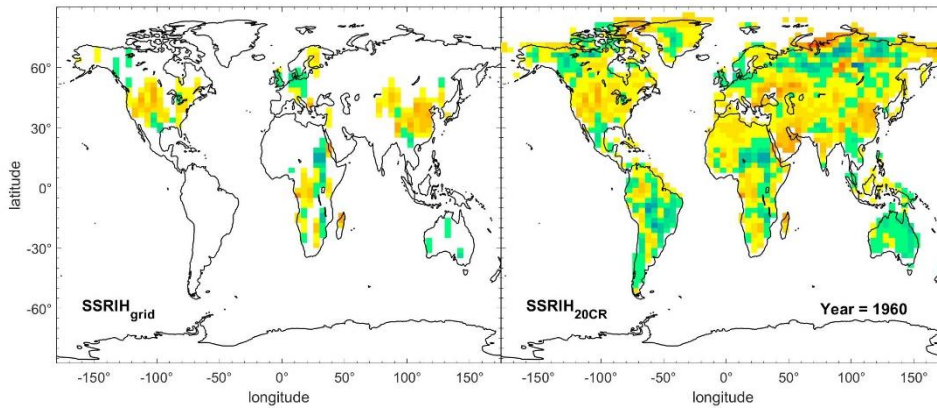

131

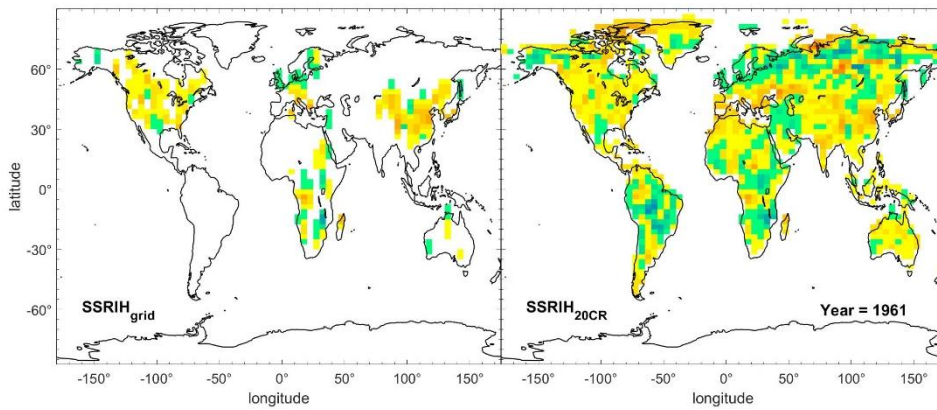

132

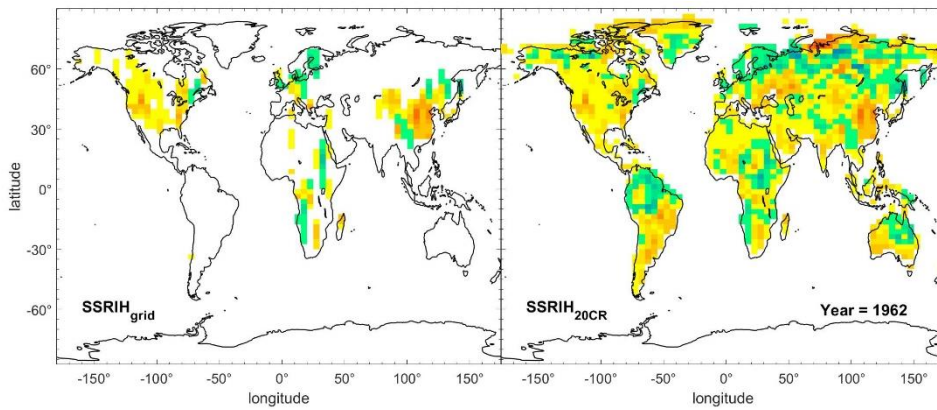

133

134

135

Figure S6-2: Spatial distribution of  $SSRIH_{grid}$  (column 1) and  $SSRIH_{20CR}$  (column 2) in typical years (1959-1962).

136



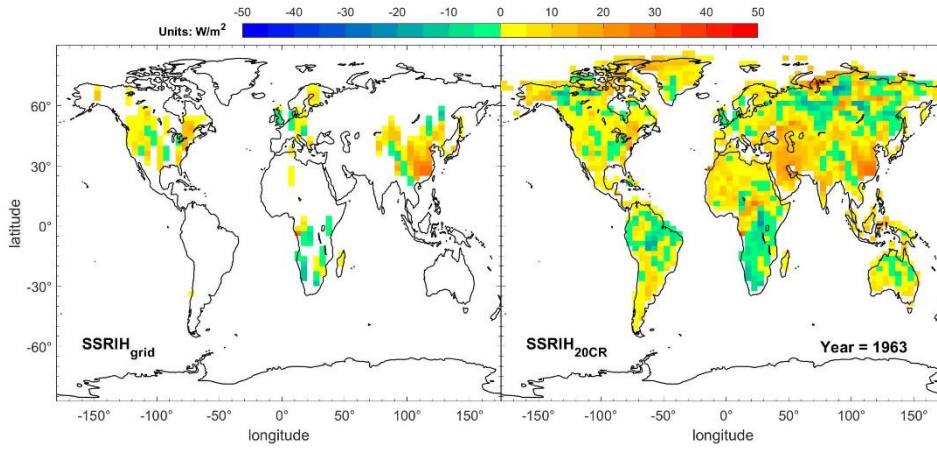

137

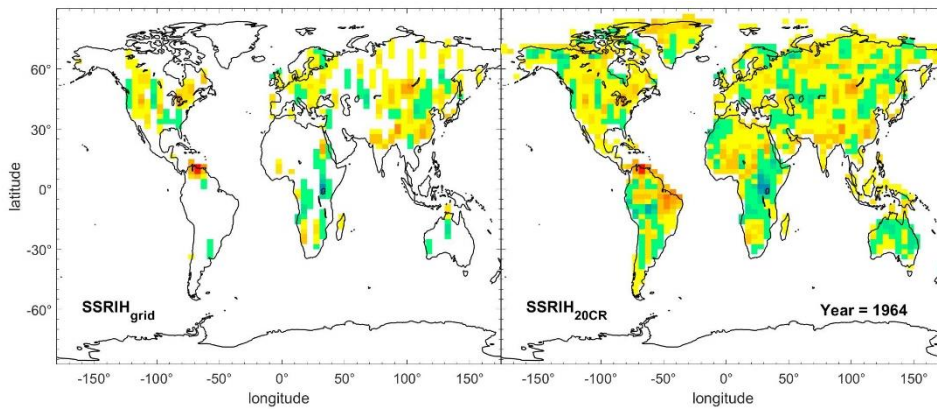

138

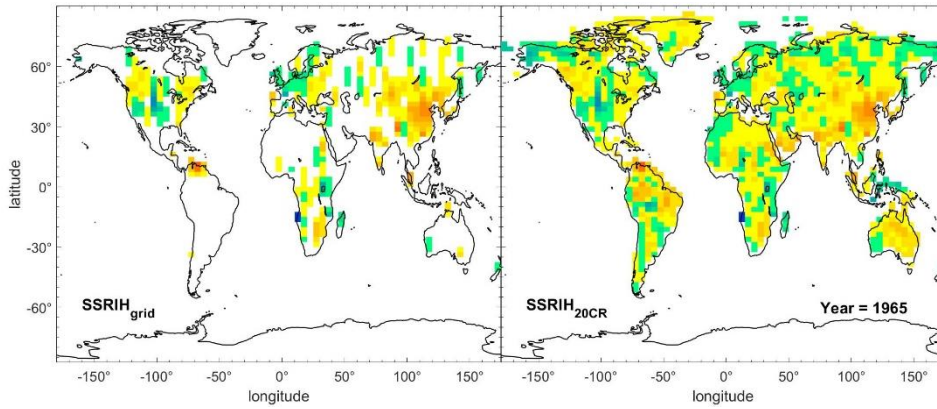

139

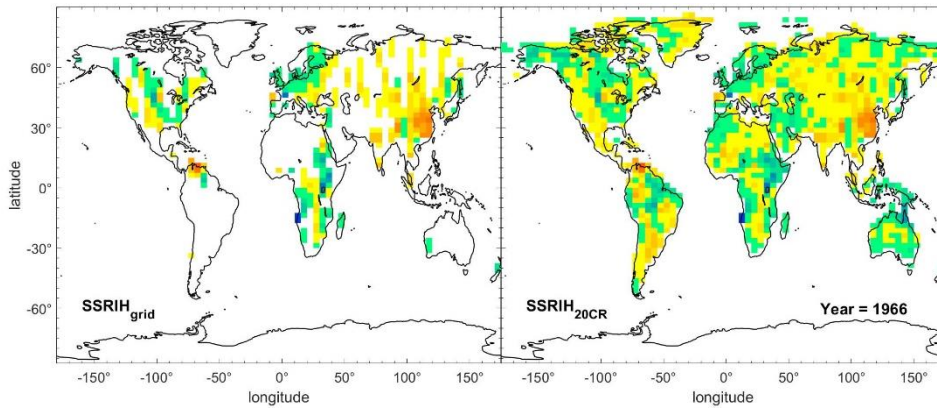

140

141

142

**Figure S6-3: Spatial distribution of SSRIH<sub>grid</sub> (column 1) and SSRIH<sub>20CR</sub> (column 2) in typical years (1963-1966).**

143

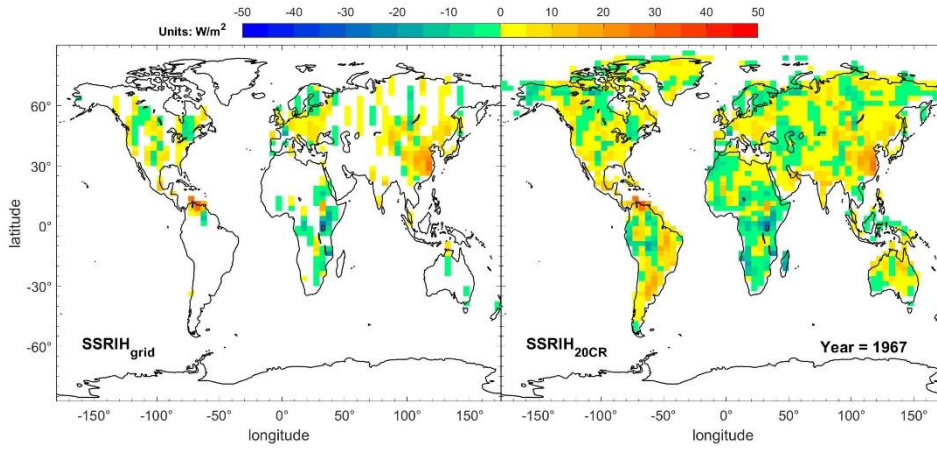

144

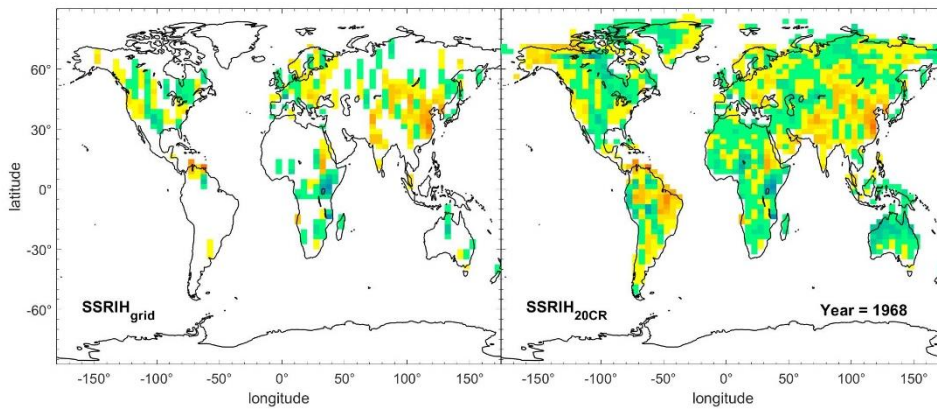

145

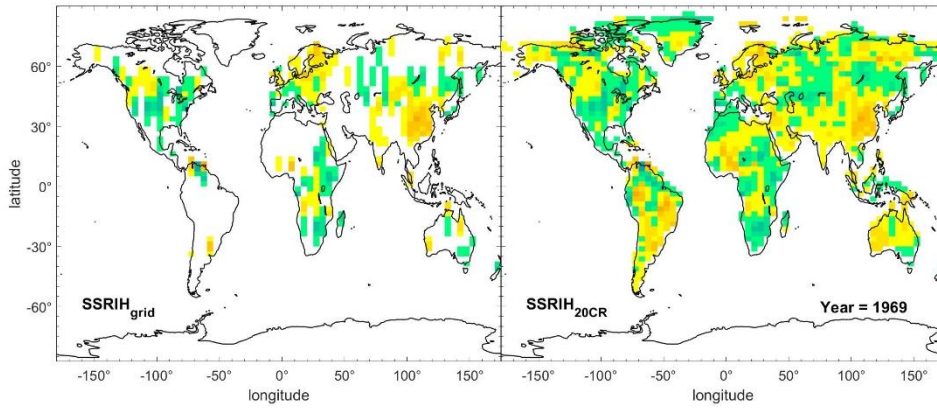

146

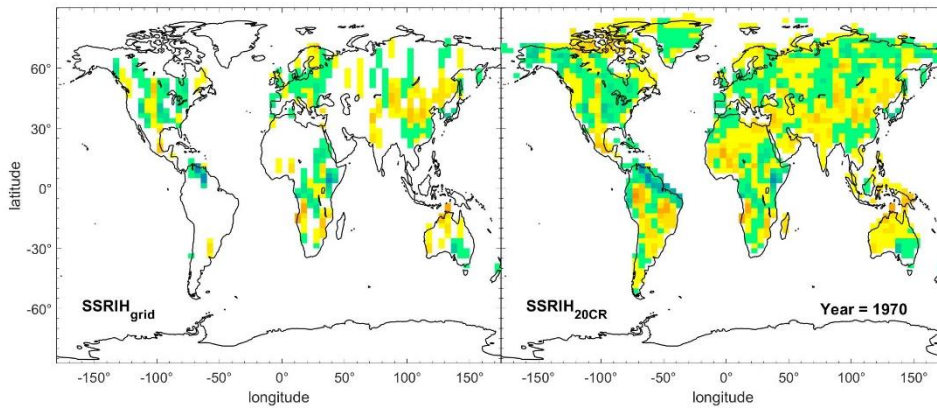

147

148

149

Figure S6-4: Spatial distribution of  $SSRIH_{grid}$  (column 1) and  $SSRIH_{20CR}$  (column 2) in typical years (1967-1970).

150



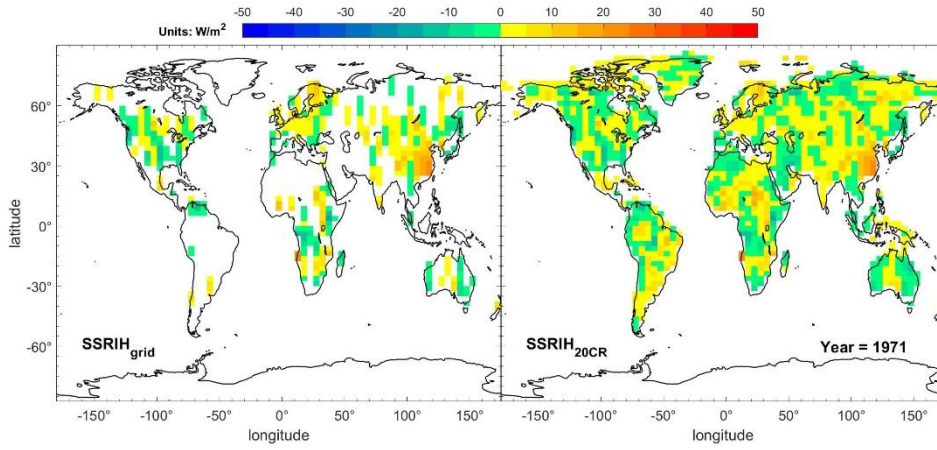

151

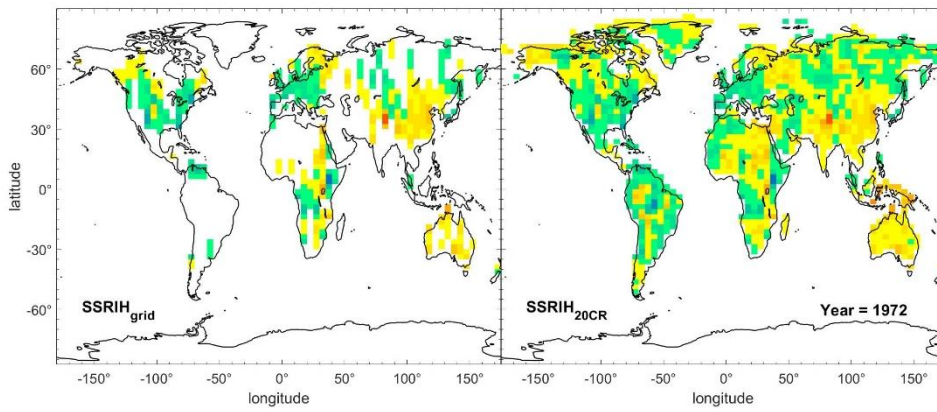

152

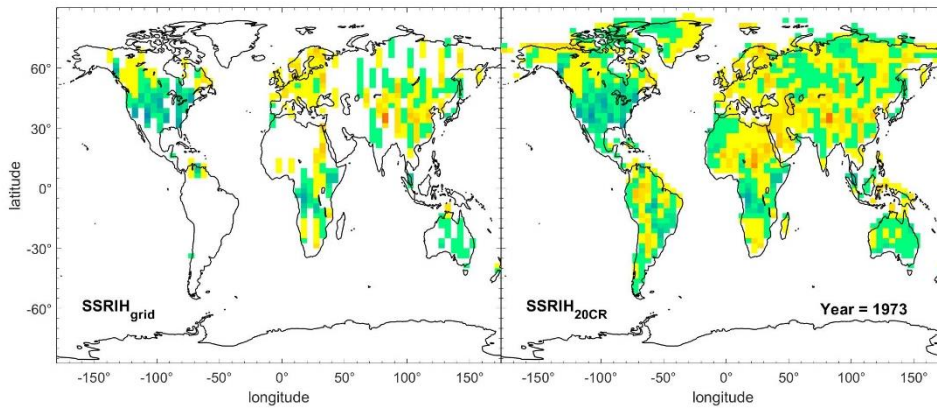

153

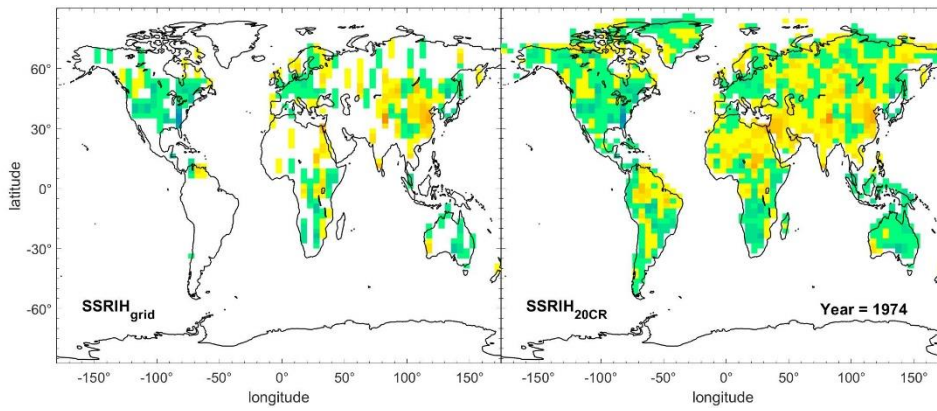

154

155

Figure S6-5: Spatial distribution of SSRIH<sub>grid</sub> (column 1) and SSRIH<sub>20CR</sub> (column 2) in typical years (1971-

156

1974).

157

158

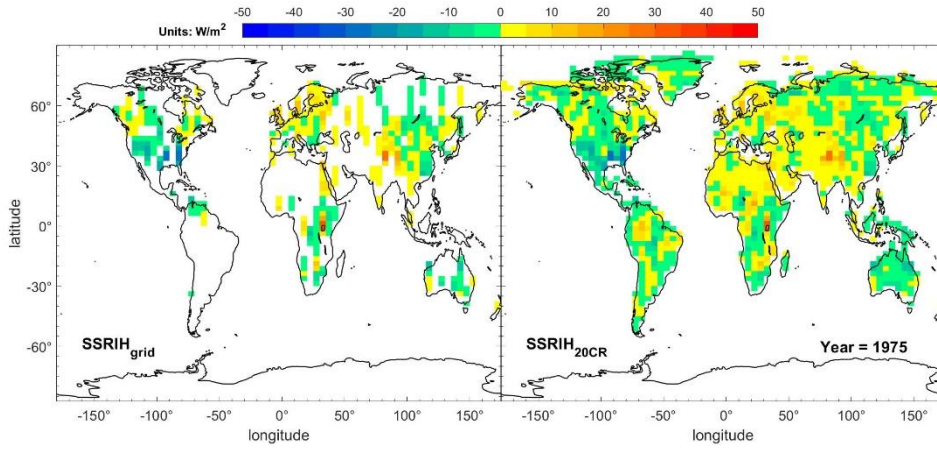

159

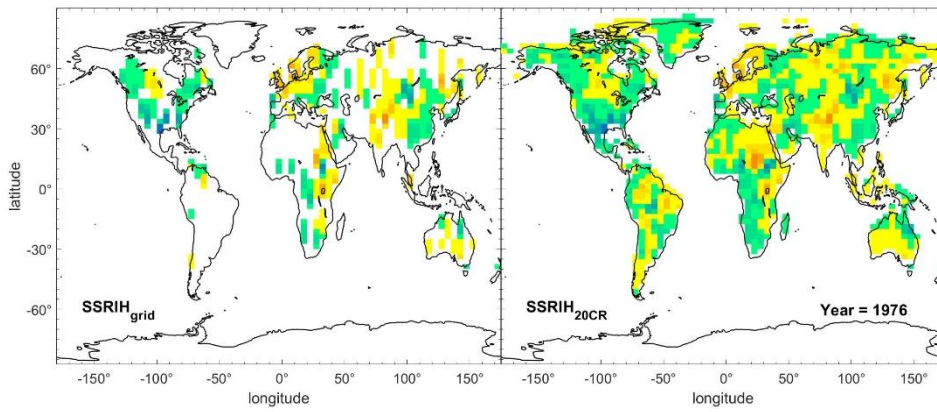

160

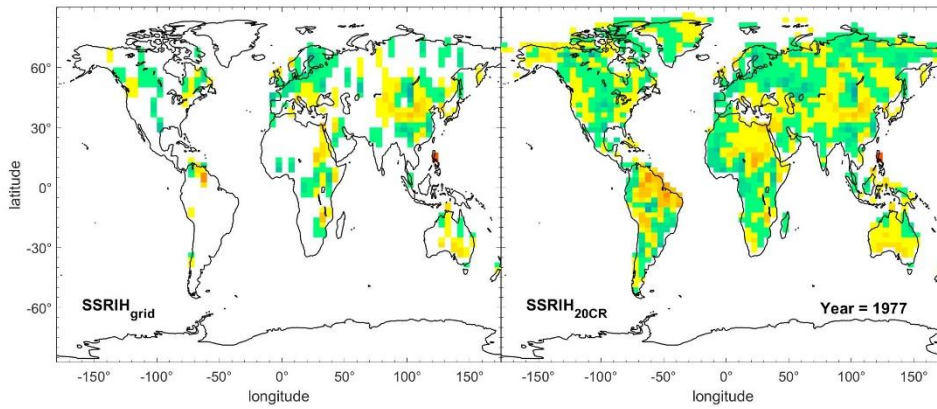

161

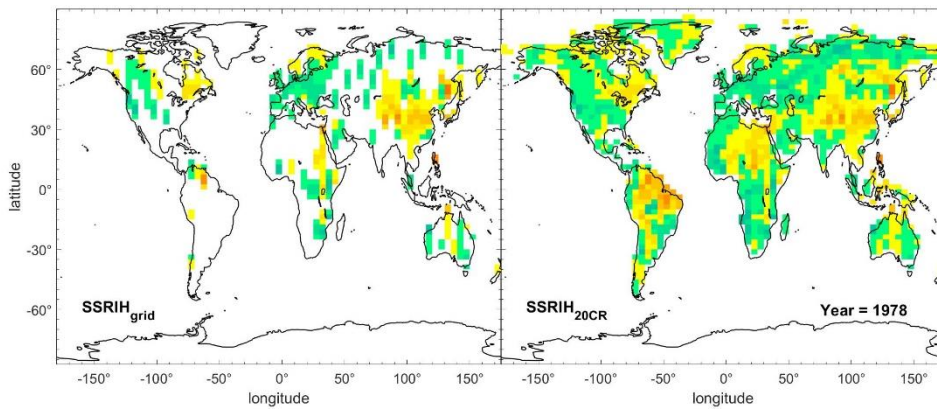

162

163

164

165

Figure S6-6: Spatial distribution of SSRIHgrid (column 1) and SSRIH20CR (column 2) in typical years (1975-1978).



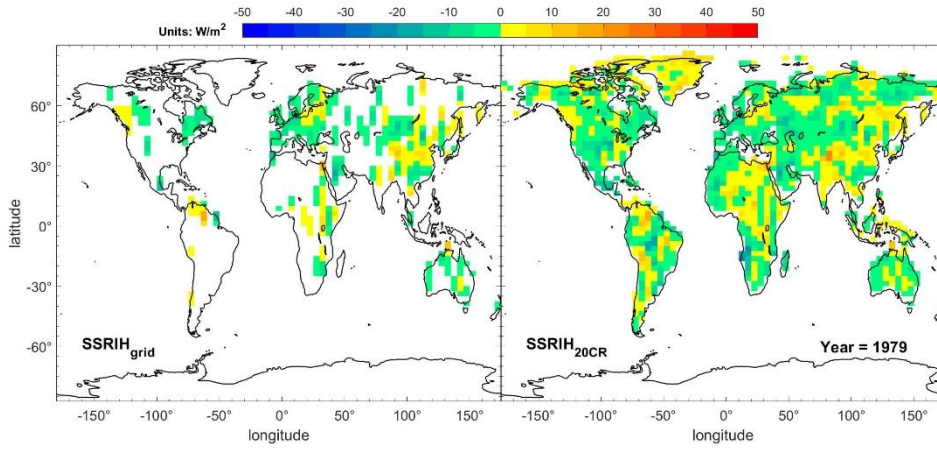

166

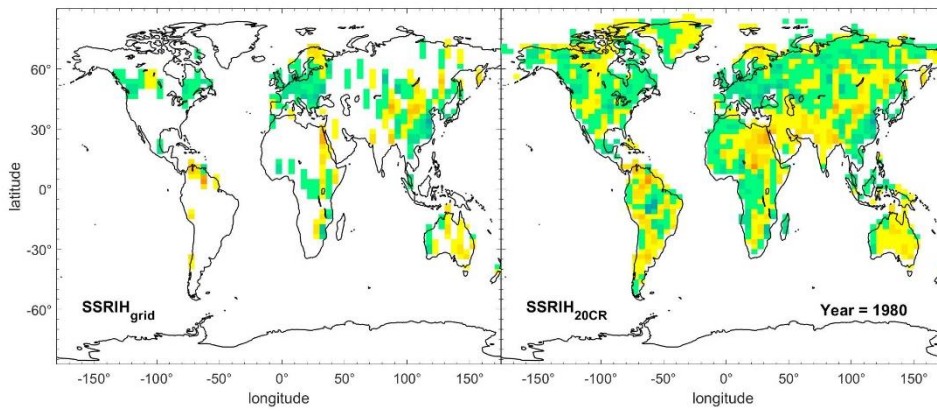

167

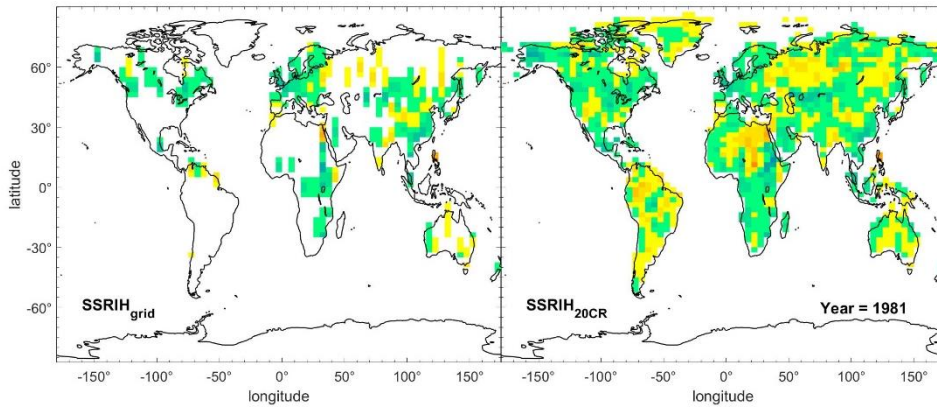

168

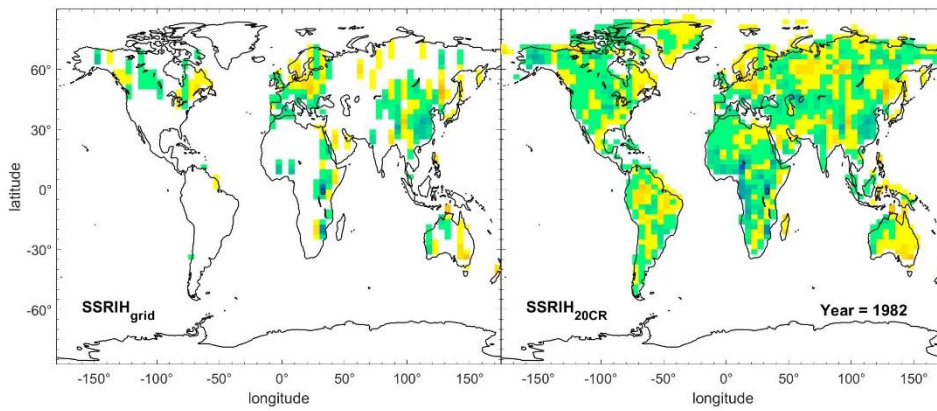

169

170

171

172

Figure S6-7: Spatial distribution of SSRIH<sub>grid</sub> (column 1) and SSRIH<sub>20CR</sub> (column 2) in typical years (1979-1982).

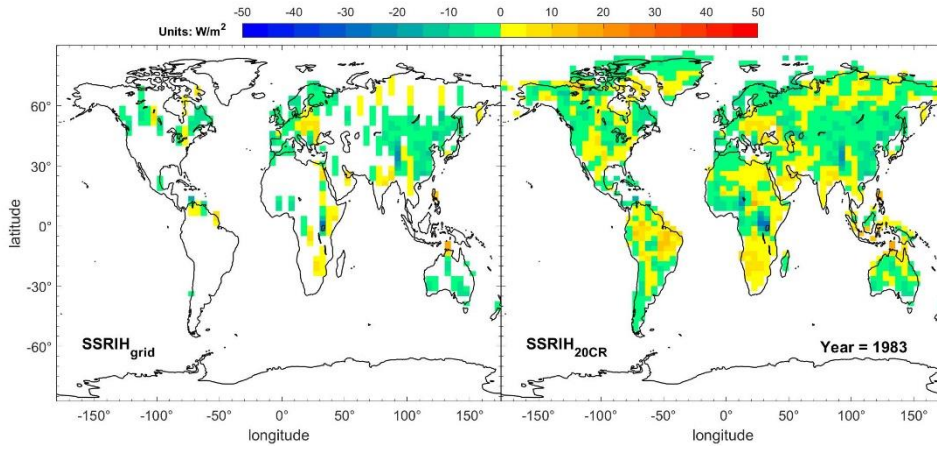

173

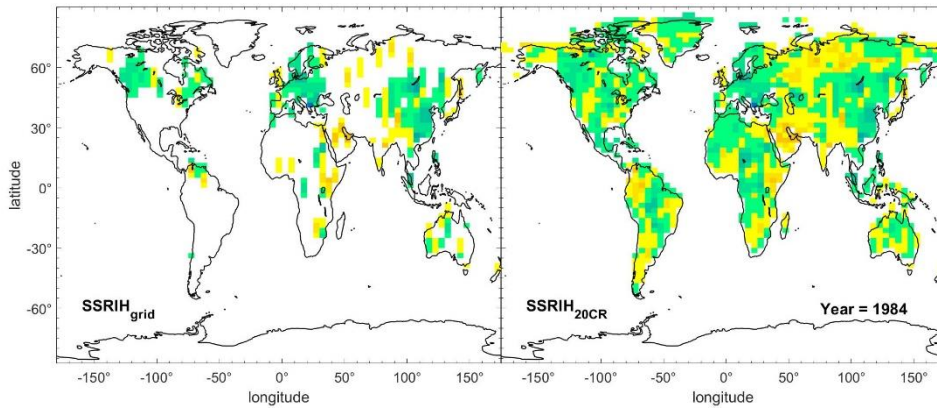

174

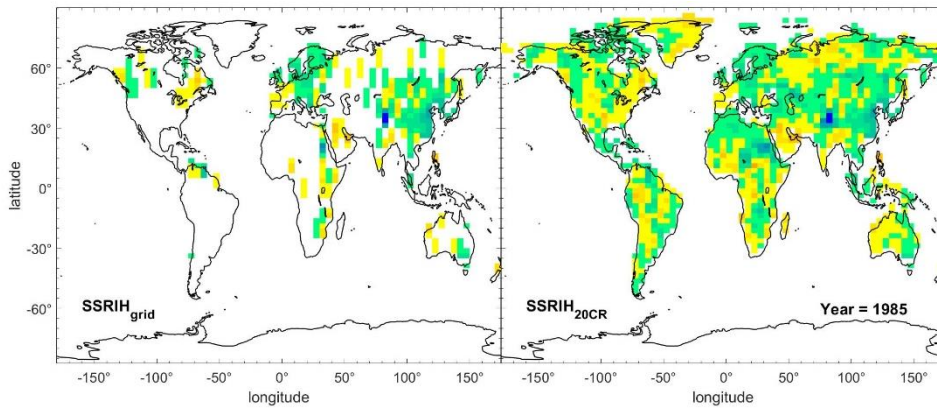

175

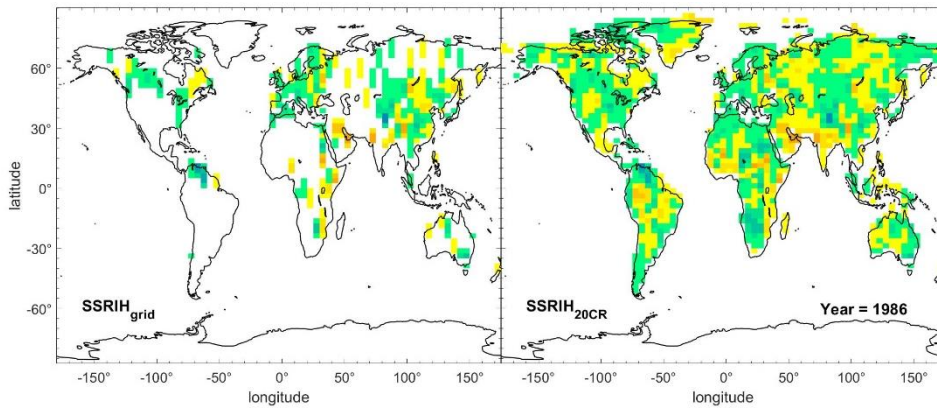

176

177

178

179

Figure S6-8: Spatial distribution of  $SSRIH_{grid}$  (column 1) and  $SSRIH_{20CR}$  (column 2) in typical years (1983-1986).



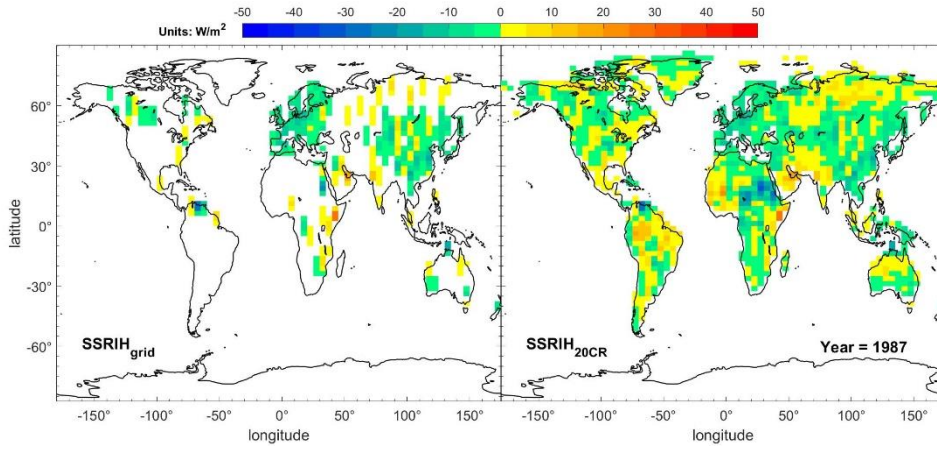

180

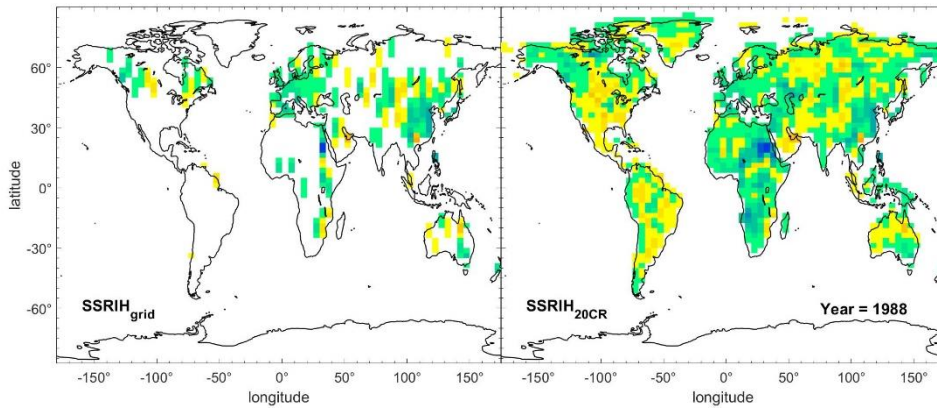

181

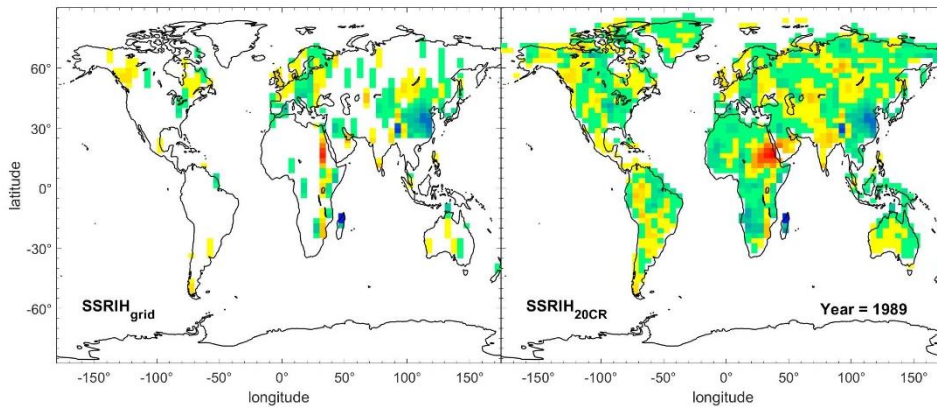

182

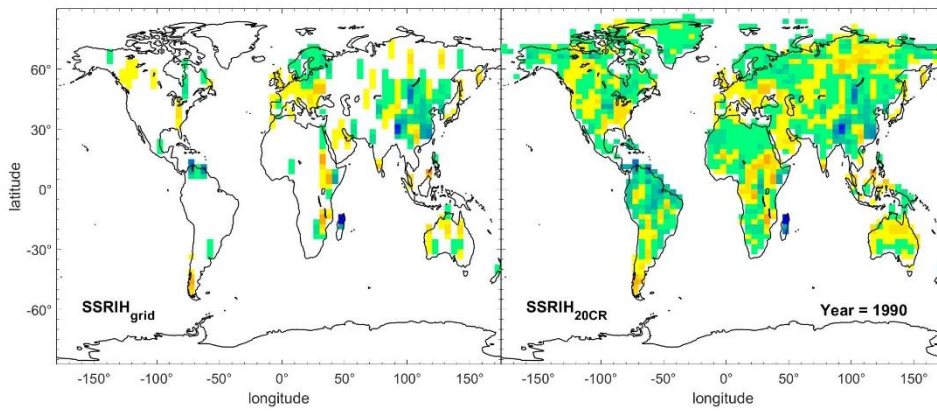

183

184

185

Figure S6-9: Spatial distribution of  $SSRIH_{grid}$  (column 1) and  $SSRIH_{20CR}$  (column 2) in typical years (1987-1990).

186

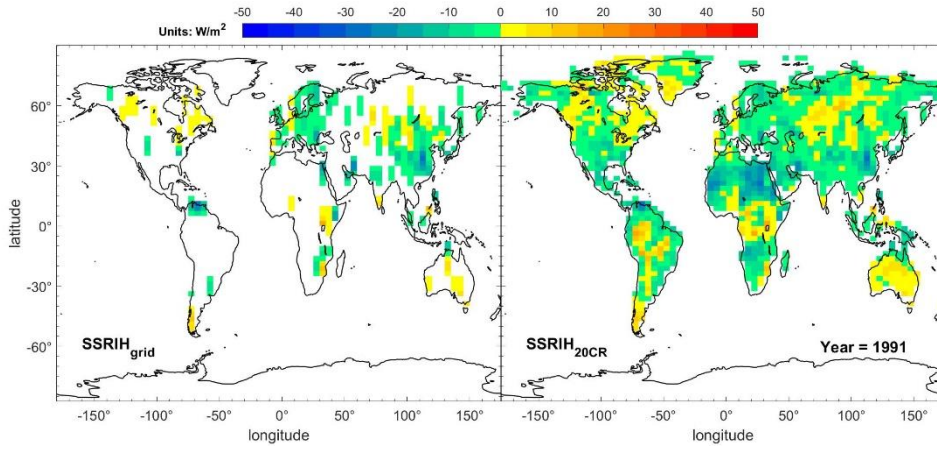

187

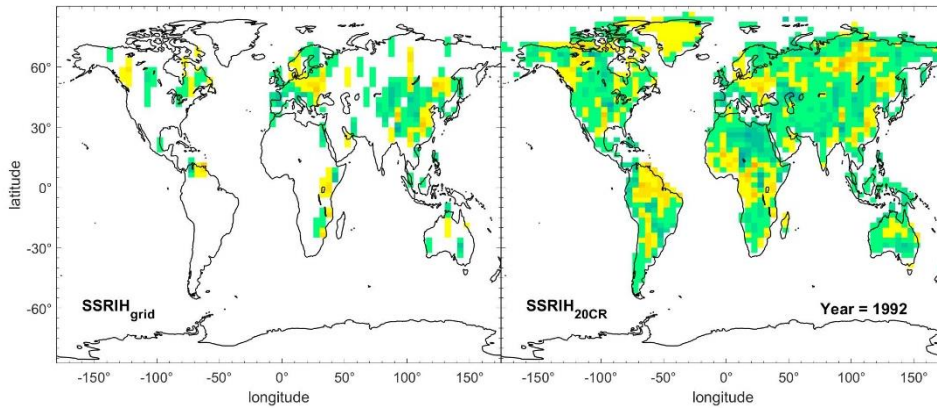

188

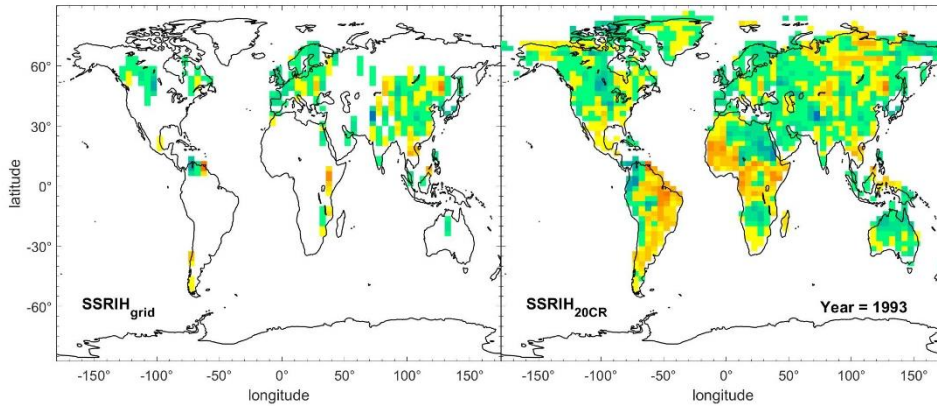

189

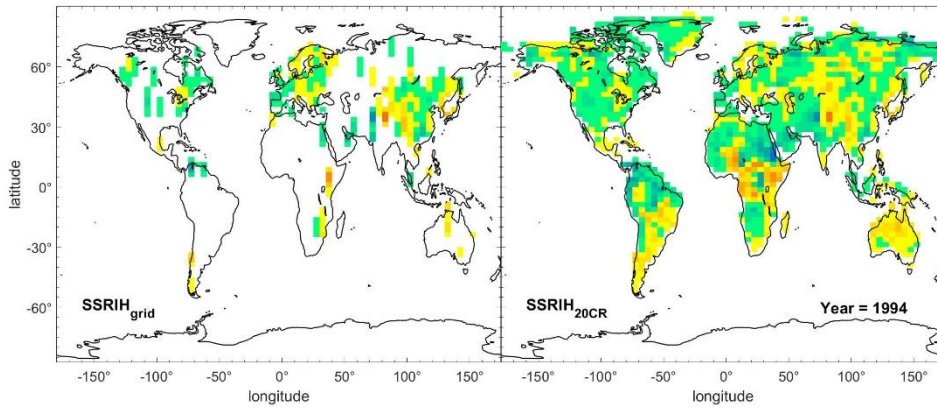

190

191

192

Figure S6-10: Spatial distribution of  $SSRIH_{grid}$  (column 1) and  $SSRIH_{20CR}$  (column 2) in typical years (1991-1994).

193



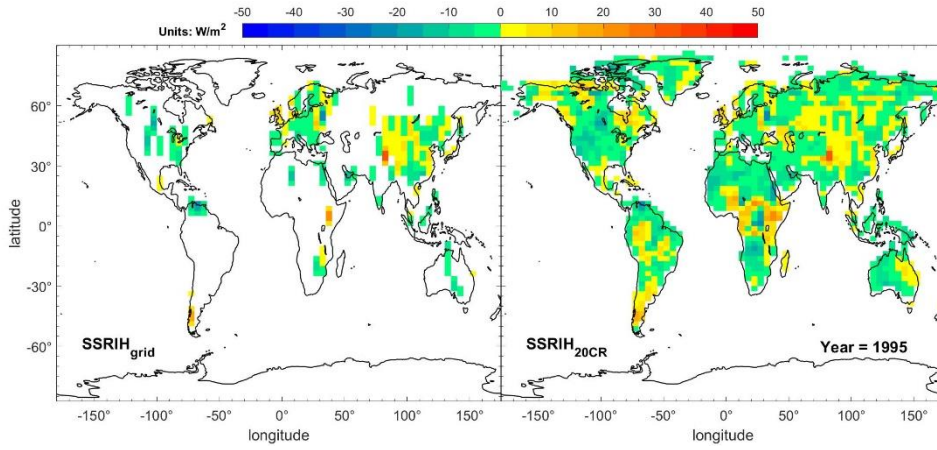

194

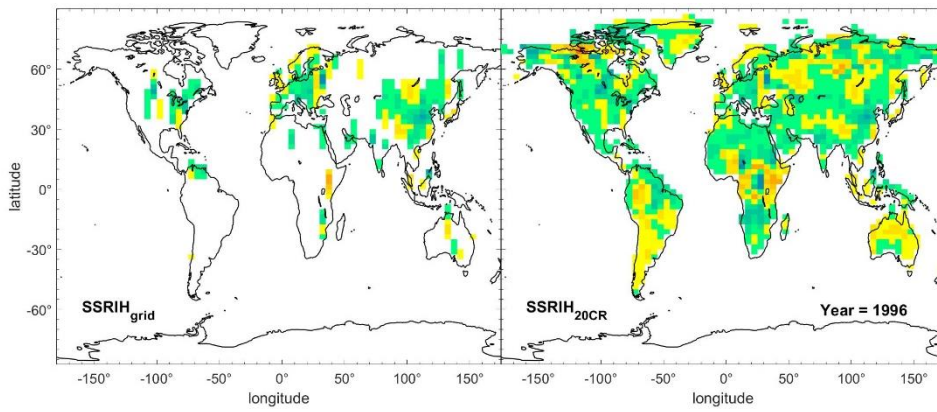

195

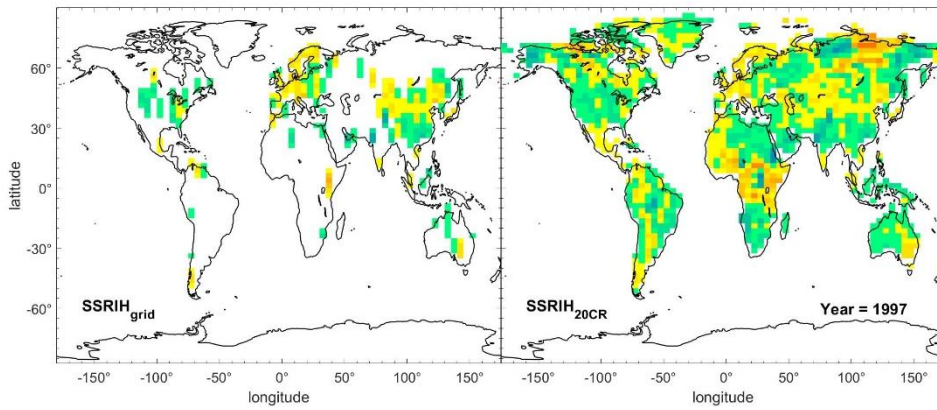

196

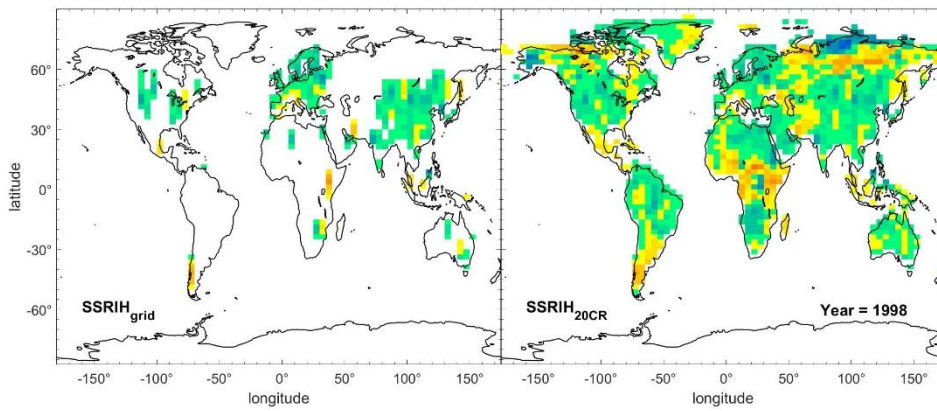

197

198

199

Figure S6-11: Spatial distribution of  $SSRIH_{grid}$  (column 1) and  $SSRIH_{20CR}$  (column 2) in typical years (1995-1998).

200

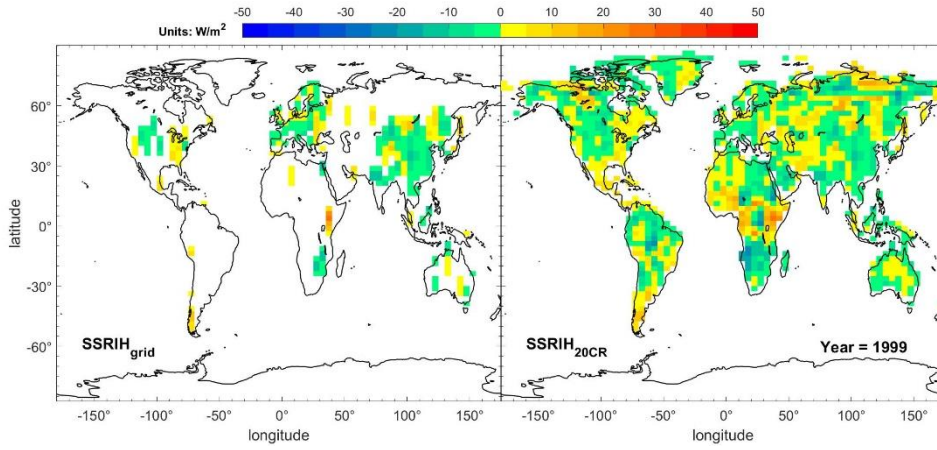

201

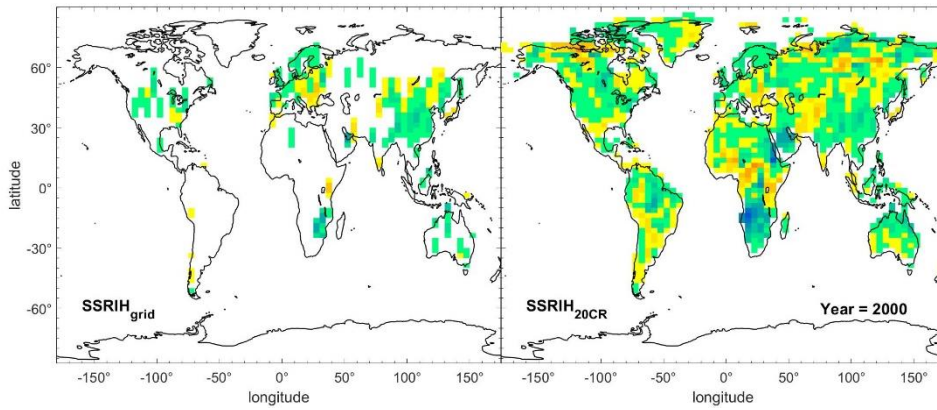

202

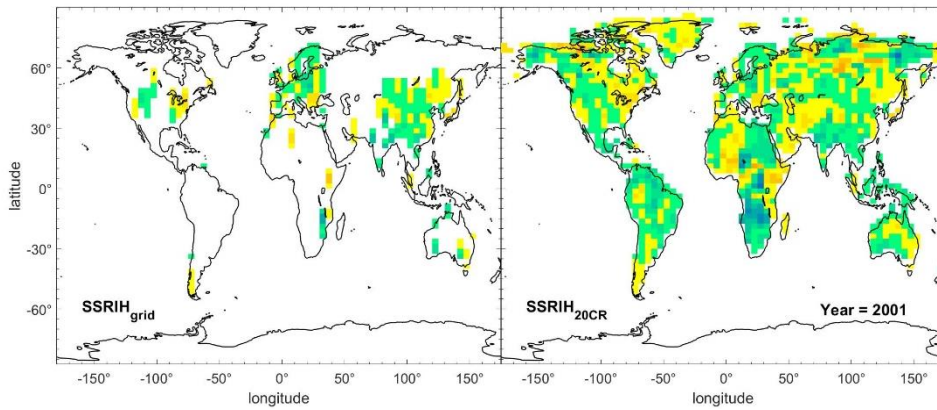

203

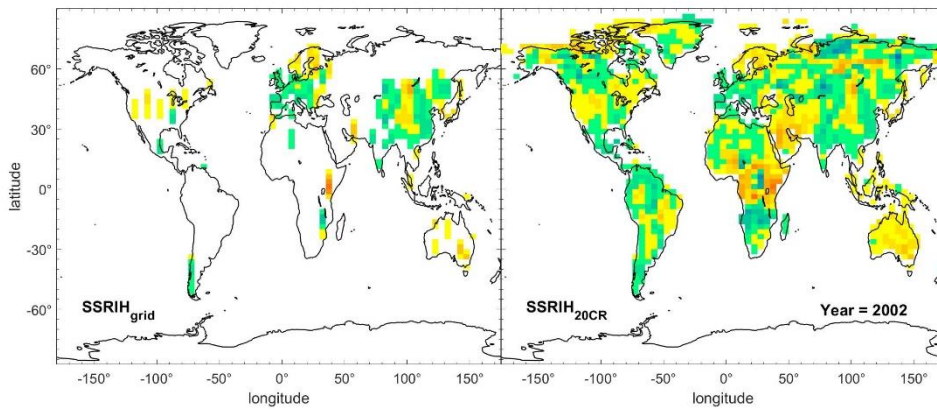

204

205

206

Figure S6-12: Spatial distribution of  $SSRIH_{grid}$  (column 1) and  $SSRIH_{20CR}$  (column 2) in typical years (1999-2002).



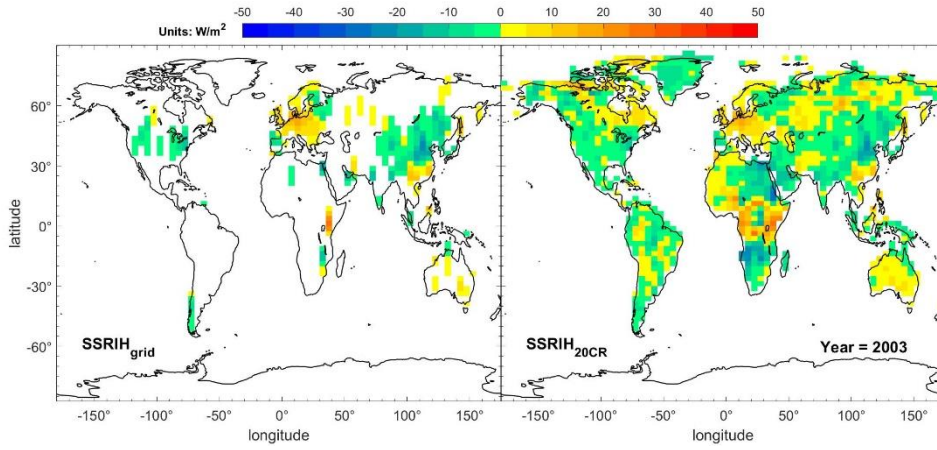

207

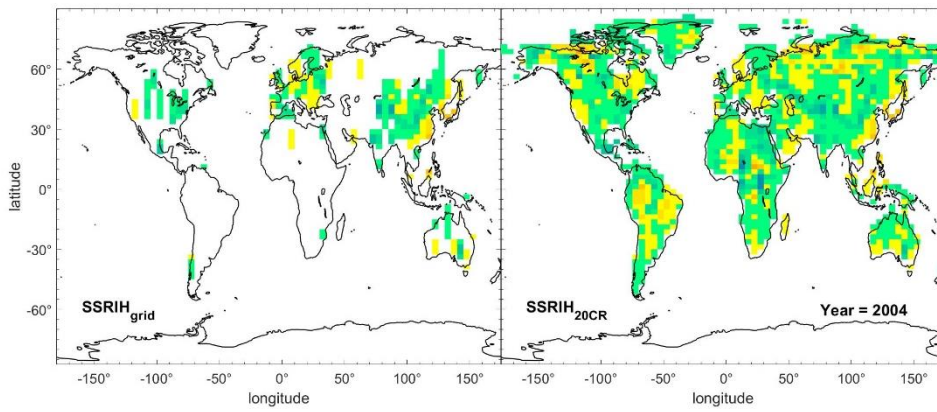

208

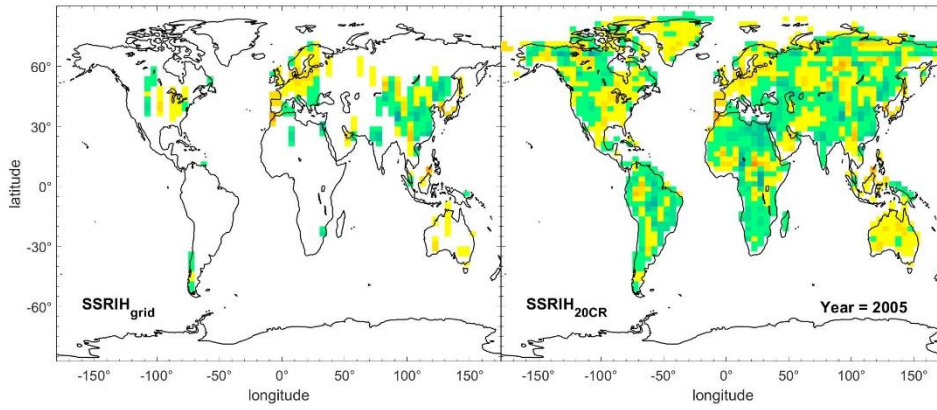

209

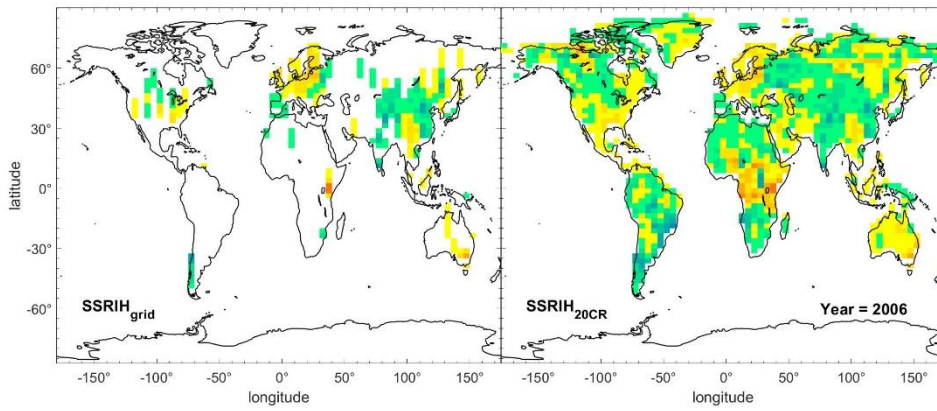

210

211

212

Figure S6-13: Spatial distribution of SSRIH<sub>grid</sub> (column 1) and SSRIH<sub>20CR</sub> (column 2) in typical years (2003-2006).

213

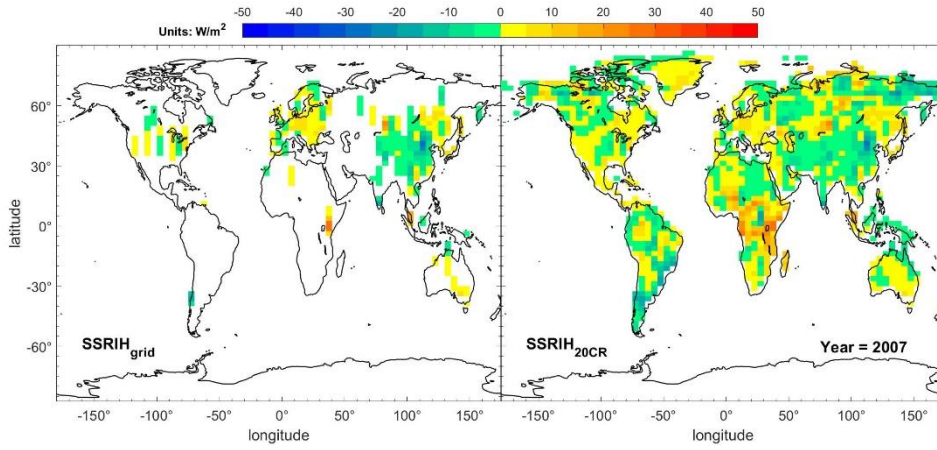

214

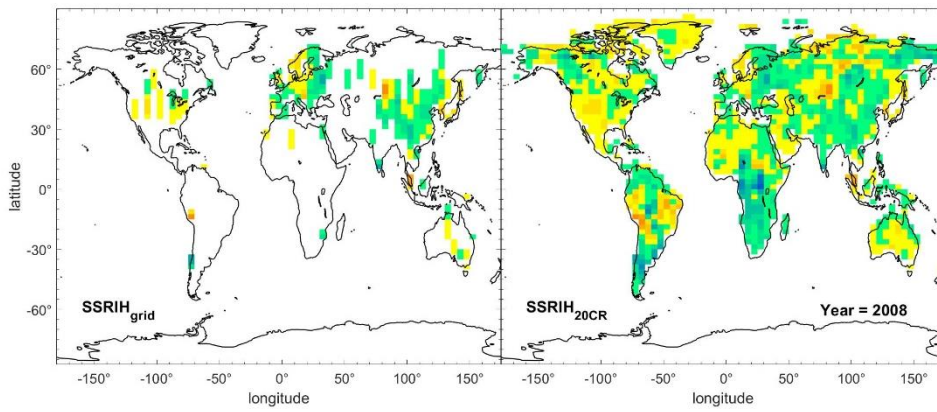

215

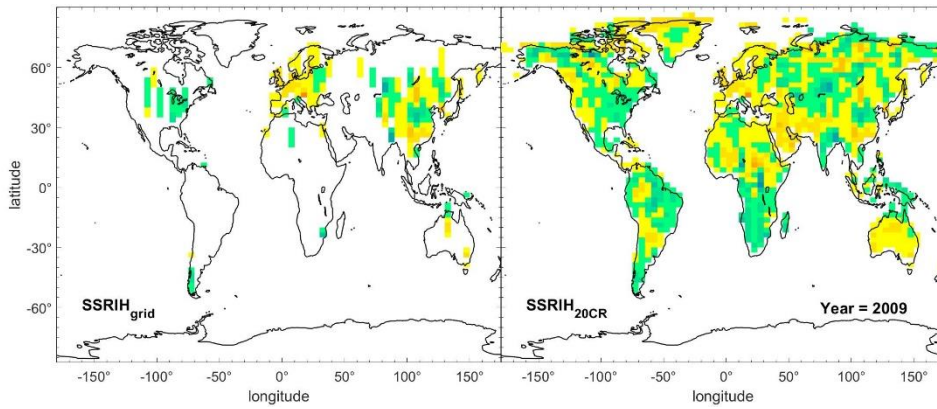

216

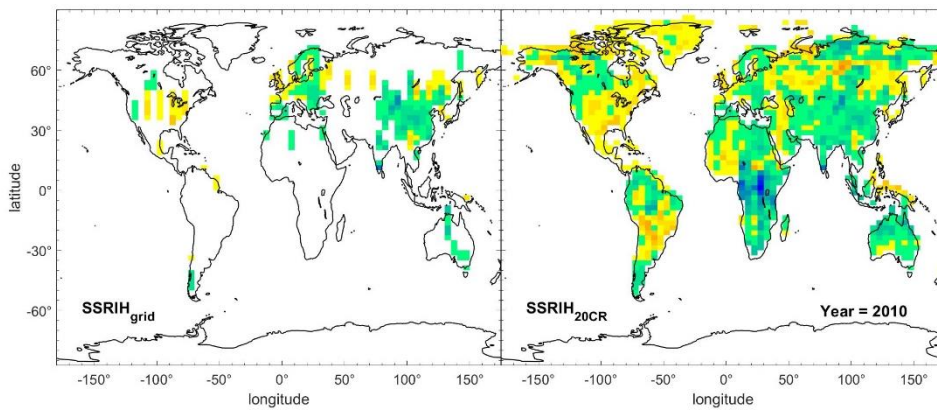

217

218

219

Figure S6-14: Spatial distribution of SSRIH<sub>grid</sub> (column 1) and SSRIH<sub>20CR</sub> (column 2) in typical years (2007-2010).

220



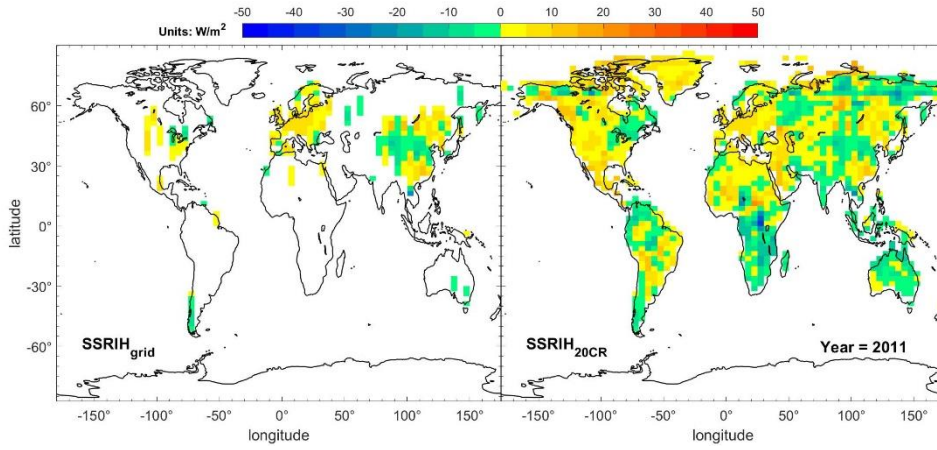

221

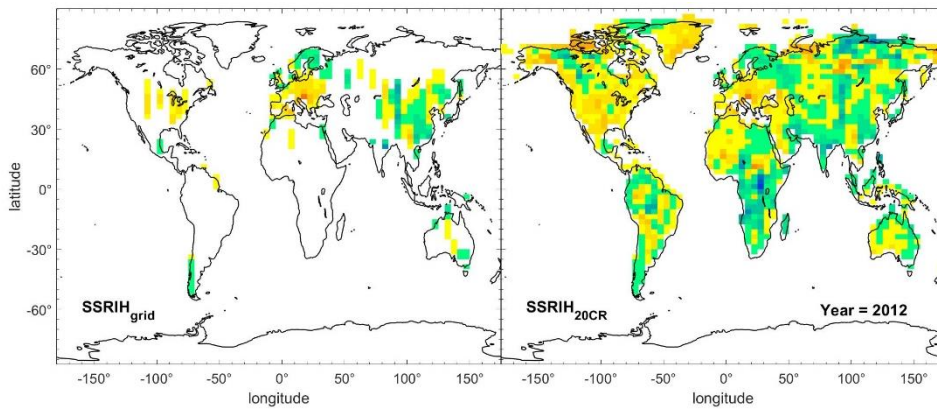

222

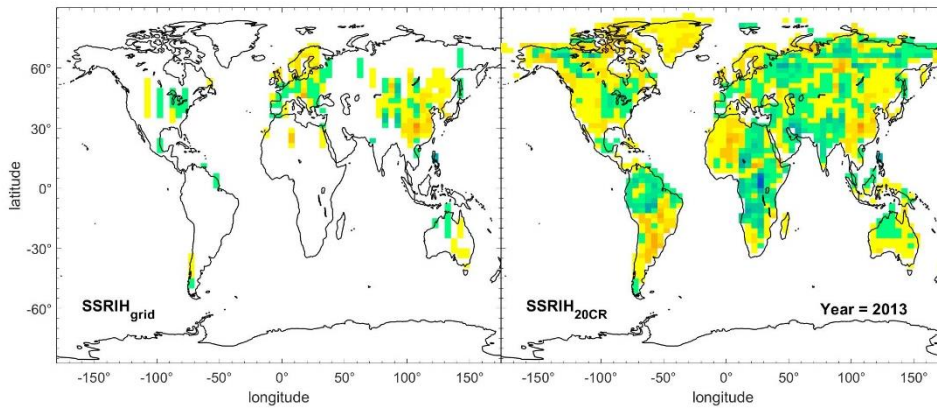

223

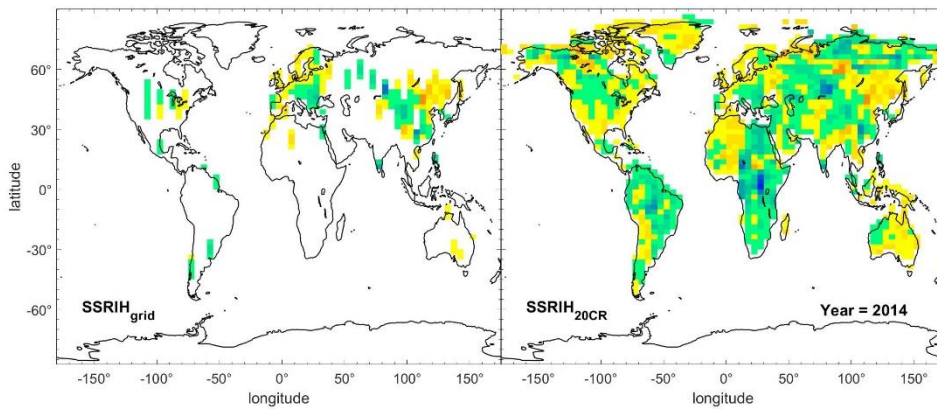

224

225

226

Figure S6-15: Spatial distribution of  $SSRIH_{grid}$  (column 1) and  $SSRIH_{20CR}$  (column 2) in typical years (2011-2014).

227

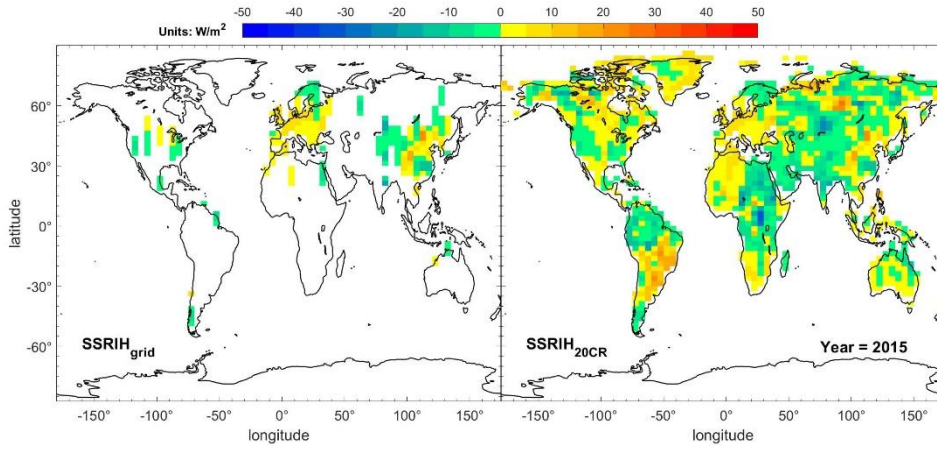

228

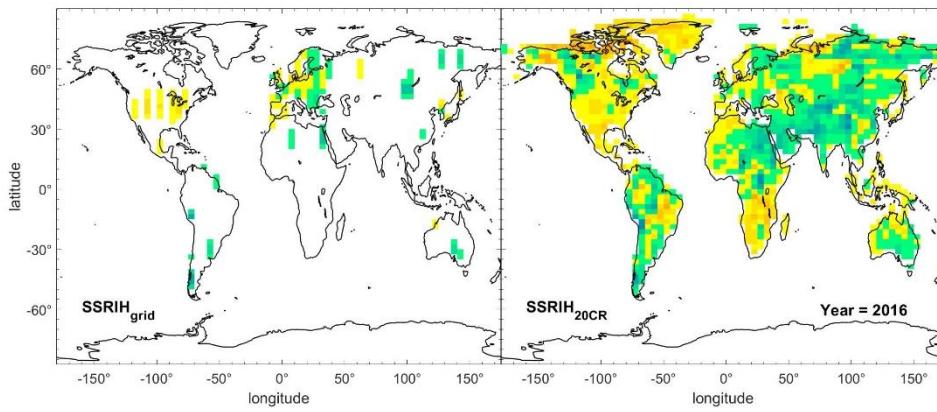

229

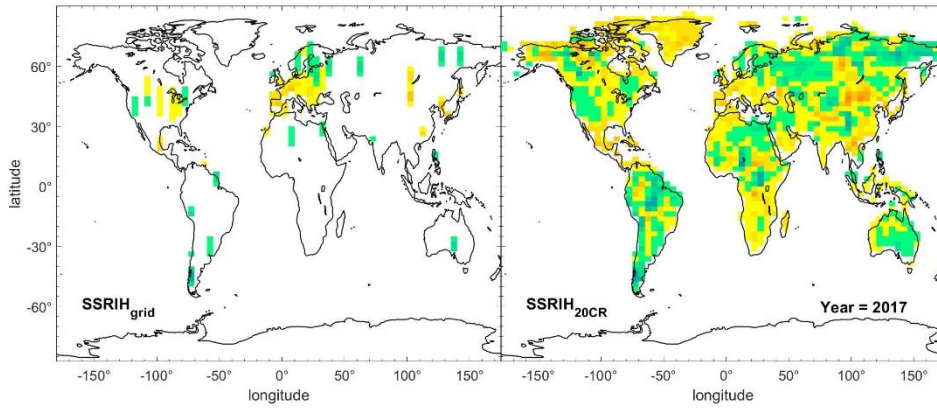

230

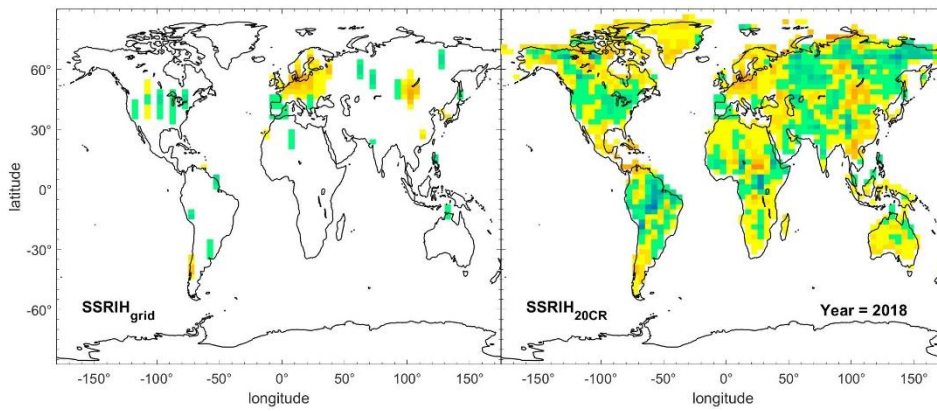

231

232

233

Figure S6-16: Spatial distribution of SSRIH<sub>grid</sub> (column 1) and SSRIH<sub>20CR</sub> (column 2) in typical years (2015-2018).

234

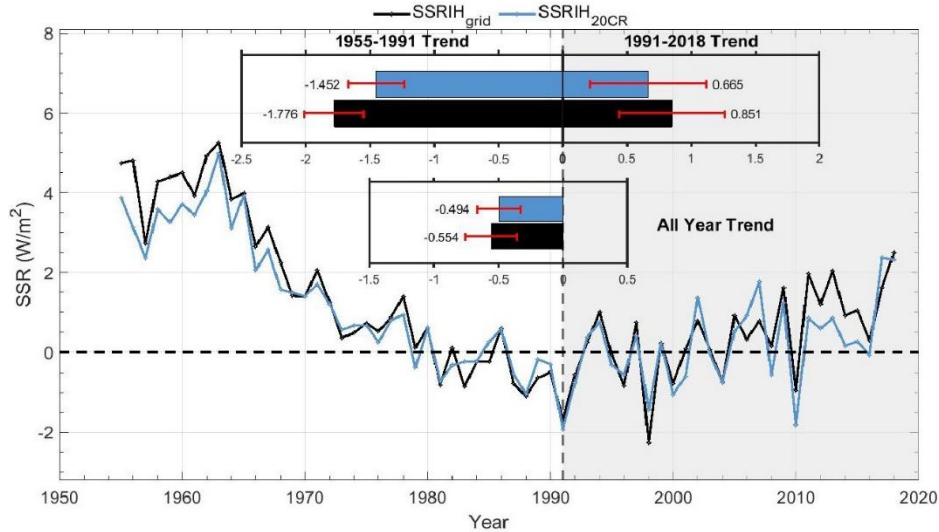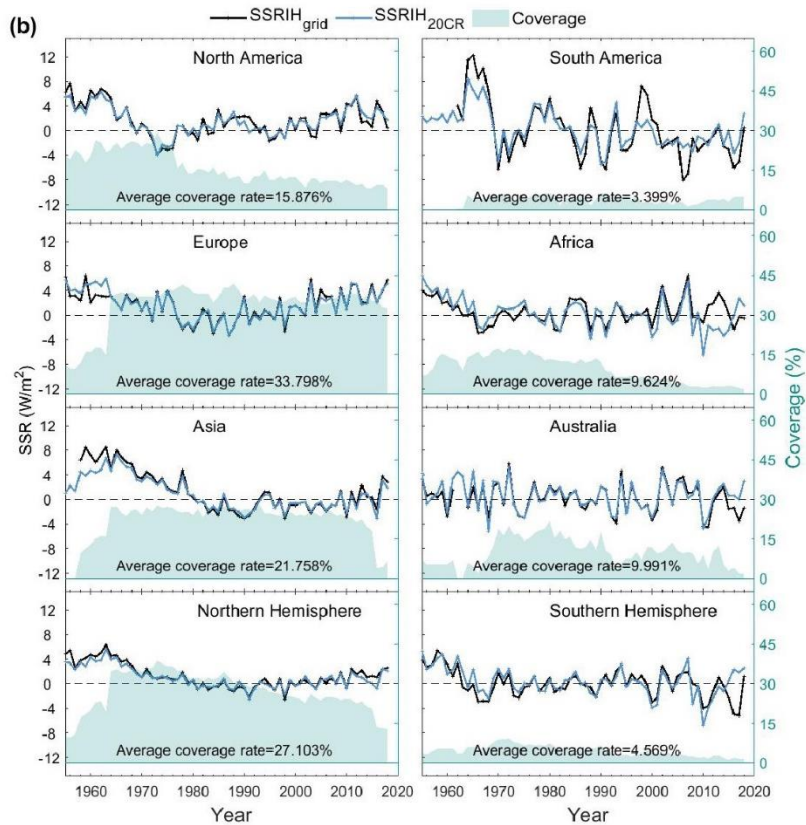

235

236

Figure S7: Global and regional (except for Antarctica) land annual SSR anomaly variations (relative to 1971-2000) before /after reconstruction. The Black solid line represents the SSRIH<sub>grid</sub> annual anomalies.

237

The solid blue line represents the reduced SSRIH<sub>20CR</sub> annual anomalies. The histograms represent the

238

decadal trends of the SSRIH<sub>grid</sub>/SSRIH<sub>20CR</sub> (unit: W/m<sup>2</sup> per decade) and their 95% uncertainty range from

239

1955 to 1991, 1991-2018 and 1955-2018, and the SSRIH<sub>20CR</sub> is reduced to the grid boxes with *in situ*

240

observations.

241



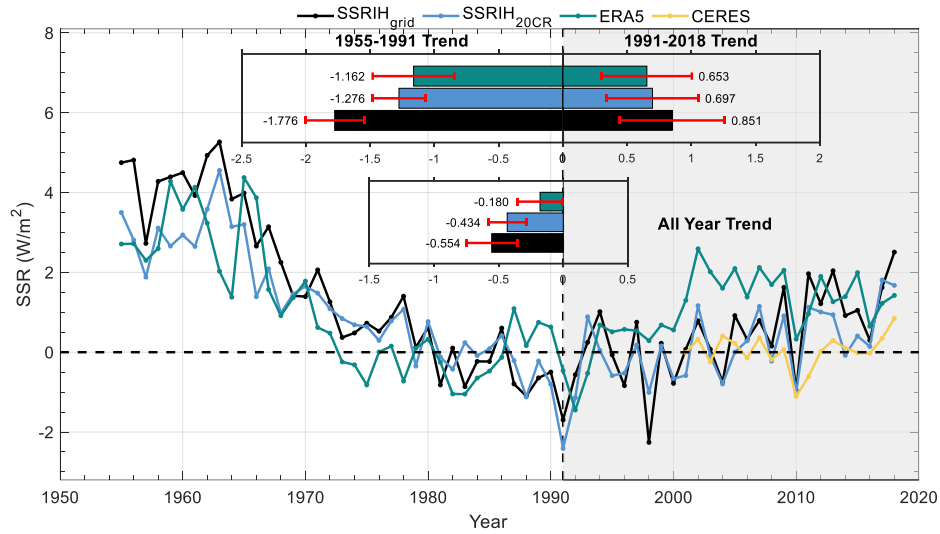

242

243 **Figure S8: Global land (except for Antarctica) annual SSR anomaly variations (relative to 1971-2000) before**  
 244 **/after reconstruction. The Black solid line represents the SSRIH<sub>grid</sub> annual anomalies. The solid blue line**  
 245 **represents the SSRIH<sub>20CR</sub> annual anomalies. The solid green line represents the ERA5 annual anomalies. The**  
 246 **solid yellow line represents the CERES annual anomalies. The histograms represent the decadal trends of the**  
 247 **SSRIH<sub>grid</sub> /SSRIH<sub>20CR</sub> /ERA5 (unit: W/m<sup>2</sup> per decade) and their 95% uncertainty range from 1955 to 1991,**  
 248 **1991-2018 and 1955-2018.**

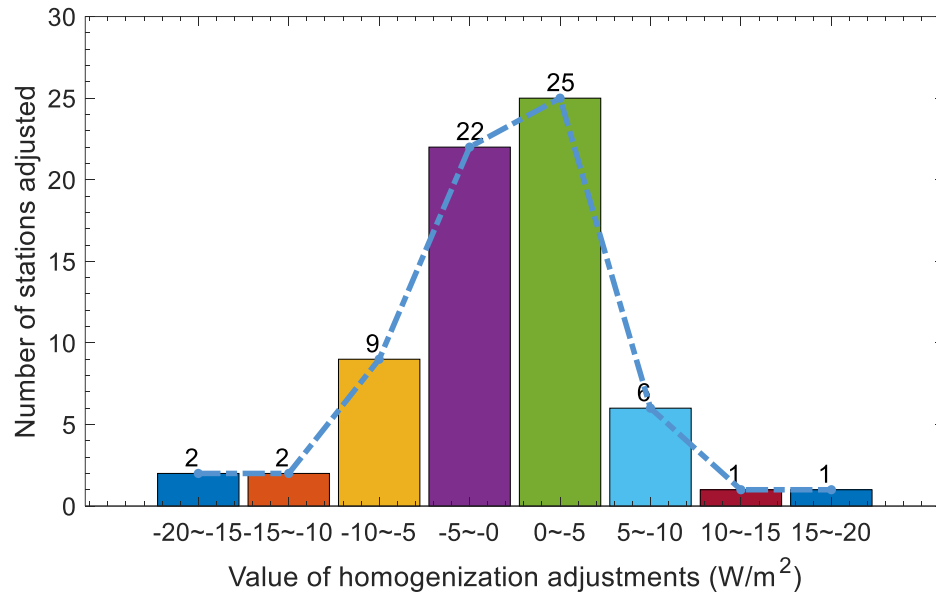

249

250 **Figure S9: Distribution of annual SSR homogenization adjustments.**

251 (The histogram is based on adjustments from all 66 stations adjusted in this paper)

252 **Reference**

- 253 Liu, G., Reda, F. A., Shih, K. J., Wang, T.-C., Tao, A., and Catanzaro, B.: Image Inpainting for Irregular  
254 Holes Using Partial Convolutions, Cham, 89-105, doi: org/10.1007/978-3-030-01252-6\_6, 2018.  
255
